# 1 **Histone H3 clipping is a novel signature of human neutrophil** 2 **extracellular traps**

3

## 4 *Authors*

5 Dorothea O Tilley<sup>1</sup>, Ulrike Abuabed<sup>2</sup>, Ursula Zimny Arndt<sup>3</sup>, Monika Schmid<sup>3</sup>, Stefan Florian<sup>4</sup>, Peter  
6 R. Jungblut<sup>3</sup>, Volker Brinkmann<sup>2</sup>, Alf Herzig<sup>\*1</sup>, Arturo Zychlinsky<sup>\*1</sup>

## 7 *Author affiliations*

8 <sup>1</sup>Department of Cellular Microbiology, Core facilities for <sup>2</sup>Microscopy and <sup>3</sup>Protein Analysis, Max  
9 Planck Institute for Infection Biology, Charitéplatz 1, 10117 Berlin.

10 <sup>4</sup>Institut für Pathologie Charité - Universitätsmedizin Berlin, Charitéplatz 1, 10117 Berlin.

11 \*shared last authorship

## 12 **Abstract**

13 Neutrophils are critical to host defence, executing diverse strategies to perform their antimicrobial  
14 and regulatory functions. One tactic is the production of neutrophil extracellular traps (NETs). In  
15 response to certain stimuli neutrophils decondense their lobulated nucleus and release chromatin  
16 into the extracellular space through a process called NETosis. However, NETosis, and the  
17 subsequent degradation of NETs, can become dysregulated. NETs are proposed to play a role in  
18 infectious as well as many non-infection related diseases including cancer, thrombosis,  
19 autoimmunity and neurological disease. Consequently, there is a need to develop specific tools for  
20 the study of these structures in disease contexts. In this study, we identified a NET-specific histone  
21 H3 cleavage event and harnessed this to develop a cleavage site-specific antibody for the detection  
22 of human NETs. By microscopy, this antibody distinguishes NETs from chromatin in purified and

23 mixed cell samples. It also detects NETs in tissue sections. We propose this antibody as a new  
24 tool to detect and quantify NETs.

## 25 Introduction

26 Neutrophil extracellular traps (NETs) are extracellular structures consisting of chromatin  
27 components, including DNA and histones, and neutrophil proteins (Brinkmann et al., 2004, Urban  
28 et al., 2009). NETs were first described as an antimicrobial response to infection, facilitating  
29 trapping and killing of microbes (Brinkmann et al., 2004). They are found in diverse human tissues  
30 and secretions where inflammation is evident (recently reviewed by Sollberger et al., 2018). NETs  
31 are produced in response to a wide-range of stimuli; bacteria (Brinkmann et al., 2004); fungi (Urban  
32 et al., 2006); viruses (Saitoh et al., 2012; Schonrich et al., 2015); crystals (Schauer et al., 2014);  
33 and mitogens (Amulic et al., 2017). Both NADPH oxidase (NOX) dependent and NOX independent  
34 mechanisms lead to NET formation (Bianchi et al., 2009; Hakkim et al., 2011; Kenny et al., 2017;  
35 Neeli and Radic, 2013). NETs are also observed in sterile disease, including multiple types of  
36 thrombotic disease (recently reviewed by Jimenez-Alcazar et al., 2017) and even neurological  
37 disease (Zenaro et al., 2015). NETs, or their components, are implicated in the development and  
38 exacerbation of autoimmune diseases including psoriasis, vasculitis and systemic lupus  
39 erythematosus (recently reviewed by Papayannopoulos, 2018) as well as cancer and cancer  
40 metastasis (Albregues et al., 2018; Cools-Lartigue et al., 2013; Demers et al., 2016).  
41 Consequently, there is an urgency across multiple fields to establish the pathological contribution  
42 of NETs to disease. However, the detection of NETs in affected tissues remains a challenge.

43 NETs are histologically defined as areas of decondensed DNA and histones that colocalise with  
44 neutrophil granular or cytoplasmic proteins. Thus, reliable detection of NETs requires a combination  
45 of anti-neutrophil and anti-chromatin antibodies as well as DNA stains. Immunofluorescent  
46 microscopy is a useful method to detect NETs in tissue sections and *in vitro* experiments. However,  
47 this can be challenging since NET components are distributed across the large decondensed  
48 structure resulting in a weak signal. For example, the signal of antibodies to neutrophil elastase

49 (NE) is significantly dimmer in NETs than in the granules of resting cells where this protease is  
50 highly concentrated. Conversely, anti-histone antibodies stain NETs strongly but not nuclei of naïve  
51 neutrophils, where the chromatin is compact and less accessible. This differential histone staining  
52 property can be exploited for the detection and quantification of NETs (Brinkmann et al., 2012).  
53 However, sample preparation and the subsequent image analysis make results between different  
54 labs difficult to compare. Thus, there is a need to identify antibodies against NET antigens.

55 NETs can also be detected through post-translational modifications (PTMs) that occur during  
56 NETosis. Histone 3 (H3) is deaminated in arginine residues - the conversion to citrulline  
57 (citrullination) - by protein arginine deiminase 4 (PAD4) (Wang et al., 2009). Citrullinated H3 (H3cit)  
58 is widely used as a surrogate marker of NETs in both *in vitro* and *in vivo* experiments (Gavillet et  
59 al., 2015; Pertiwi et al., 2018; Wang et al., 2009; Yoo et al., 2014; Yoshida et al., 2013). Cleavage  
60 of histones by granular derived neutrophil serine proteases (NSPs) also contributes to NETosis  
61 (Papayannopoulos et al., 2010). Histone cleavage, or clipping, by cysteine or serine proteases is a  
62 bona fide histone PTM that facilitates the gross removal of multiple, subtler, PTMs in the histone  
63 tail and is conserved from yeast to mammals (Dhaenens et al., 2015). Until now, histone clipping  
64 has not been exploited for the detection of NETs but recent work by our group showed that histone  
65 H3 cleavage is a conserved response to diverse NET stimuli, including *Candida albicans* and Group  
66 B Streptococcus (Kenny 2017). Thus, in this study we map the site(s) of histone H3 cleavage during  
67 NETosis. We developed a new monoclonal antibody against cleaved H3 that detects human NETs  
68 *in vitro* and in histological samples. This antibody also facilitates easier NET quantification.

## 69 Results

### 70 *Serine protease dependent cleavage of Histone H3 N-terminal tails during NET* 71 *formation*

72 Histones are processed in response to phorbol 12 myristate 13 acetate - PMA (Papayannopoulos  
73 et al., 2010; Urban et al., 2009) and other NET stimuli (Kenny et al., 2017). Indeed, the cleavage

74 products of H3 were consistent between stimuli (Kenny et al., 2017). This suggests that H3  
75 proteolysis occurs at specific sites during NETosis. In a time course experiment of human  
76 neutrophils incubated with PMA, we detected a H3 cleavage product of ~14 kDa as early as 30 min  
77 post-stimulation (Figure 1A). Further cleavages occurred between 60 and 90 min, yielding products  
78 of approximately 13 kDa and 10 kDa, respectively. The histone N-terminal tails protrude from the  
79 nucleosome core and are a major PTM target (Bannister and Kouzarides, 2011). A C-terminal, but  
80 not an N-terminal, histone antibody detected the cleavage products of H3 (Figure 1A). These  
81 results indicate that the N-terminus is cleaved in truncated H3.

82 Neutrophil azurophilic granules are rich in serine proteases that can degrade histones *in vitro*  
83 (Papayannopoulos et al., 2010). We tested the contribution of these proteases to H3 cleavage  
84 during NET formation. Preincubation with the serine protease inhibitor, AEBSF (4- [2-aminoethyl]  
85 benzensulfonylfluoride) (Figure 1A), but not with the cysteine protease inhibitor E64 (Figure 1–  
86 figure supplement 1), inhibited H3 cleavage upon PMA stimulation. AEBSF also inhibited NET  
87 formation and nuclear decondensation as shown by immunofluorescent microscopy (Figure 1B).  
88 PMA induced NETosis requires NADPH oxidase activity and, at high concentrations, AEBSF can  
89 inhibit activation of NADPH oxidase (Diatchuk et al., 1997). To rule out this upstream effect, we  
90 showed that AEBSF did not inhibit ROS production at the concentrations used in our assay (Figure  
91 1–figure supplement 2). Similarly, we verified that at these concentrations AEBSF was not  
92 cytotoxic, as shown by limited LDH release (Figure 1–figure supplement 3). This data shows that  
93 serine proteases cleave the N-terminus of H3 early during NET formation.



**A**

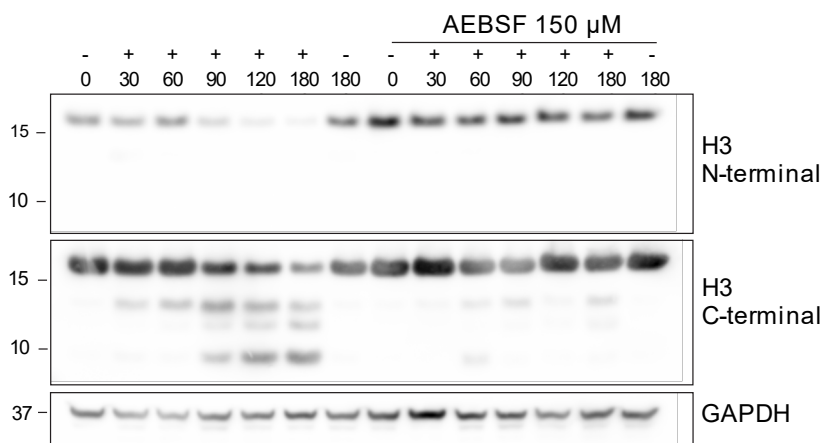

**B**

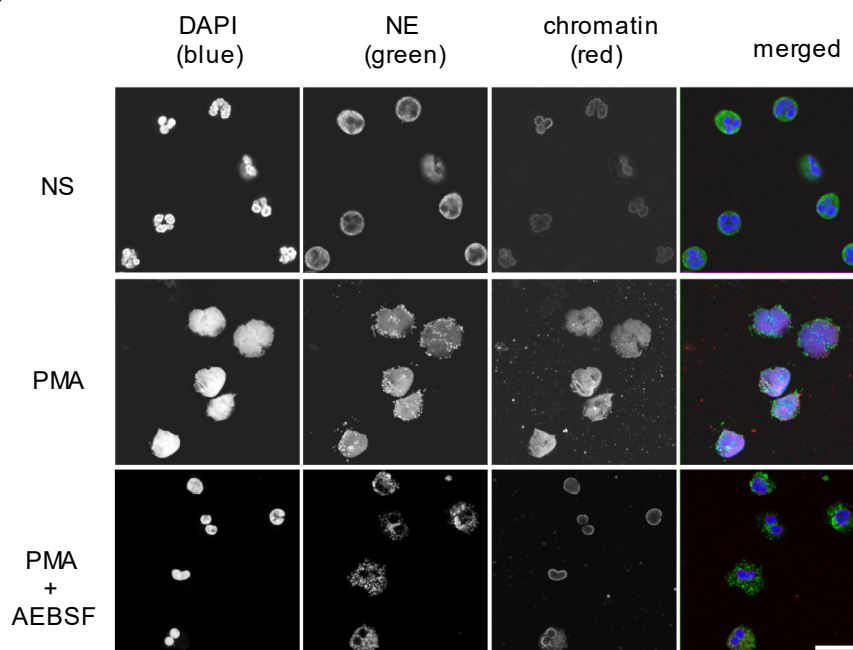

94

95

96 **Figure 1. PMA induced Histone H3 cleavage occurs in the N-terminal domain & is prevented by serine**  
97 **protease inhibition.**

98 (A) Neutrophils were preincubated with the serine protease inhibitor AEBSF for 30 min in microcentrifuge  
99 tubes and then stimulated with PMA as indicated in the figure. Lysates were resolved by SDS-PAGE and  
100 immunoblotted with N- and C-terminal antibodies to H3. GAPDH was used as a loading control. Blots  
101 representative of 3 independent experiments. (B) Immunofluorescent confocal microscopy of NET formation.  
102 Neutrophils were seeded on coverslips and preincubated with AEBSF before stimulation with PMA (50 nM)  
103 as indicated in the figure. At 150 min the cells were fixed and stained for neutrophil elastase (NE), chromatin  
104 (using a H2A-H2B-DNA antibody PL2.3) and DNA (DAPI [4',6-diamidino-2-phenylindole]). NS: non-  
105 stimulated. Images were taken at 63X and the scale bar is 20 μm. Images are representative of 3 independent  
106 experiments.

## 107 *Histone H3 is cleaved at a novel site in the globular domain*

108 To identify the precise H3 cleavage sites we prepared histone enriched extracts from primary  
109 neutrophils stimulated with PMA for 90 min and then purified H3 by RP-HPLC as previously  
110 described (Shechter et al., 2007). A schematic summary of this is presented in Figure 2-figure  
111 supplement 1. We identified the fractions containing H3 and its cleaved products by Western blot  
112 with anti-H3 C-terminal antibodies (Figure 2A). As expected, H3 was the last core histone to elute  
113 (at 45-46 min).

114 We further separated H3 and its truncated forms by two-dimensional electrophoresis (2-DE) and  
115 confirmed their identity by mass spectrometry (Figure 2B and Figure 2-figure supplements 2 and  
116 3). The sequence coverage did not include residues that allowed the differentiation of H3 variants.  
117 The N-terminals of the separated H3 fragments were not covered by MS and therefore sequenced  
118 by Edman degradation from 2 independent experiments (Figure 2C). The N-terminal sequence of  
119 the largest molecular weight H3 spot matched that of intact H3 (Figure 2B, spot 1). We did not  
120 obtain reliable sequencing of spots 2 and 3 but the cleavage sites of spots 4 and 5 were identified.  
121 The most truncated H3 fragment (spot 5) was cleaved between L48 and R49, in the globular  
122 domain of the protein, within the nucleosome core structure (Figure 2D). This is a previously  
123 unidentified cleavage site in H3 and, thus, we selected cleavage at H3R49 as a candidate marker  
124 of NETs.

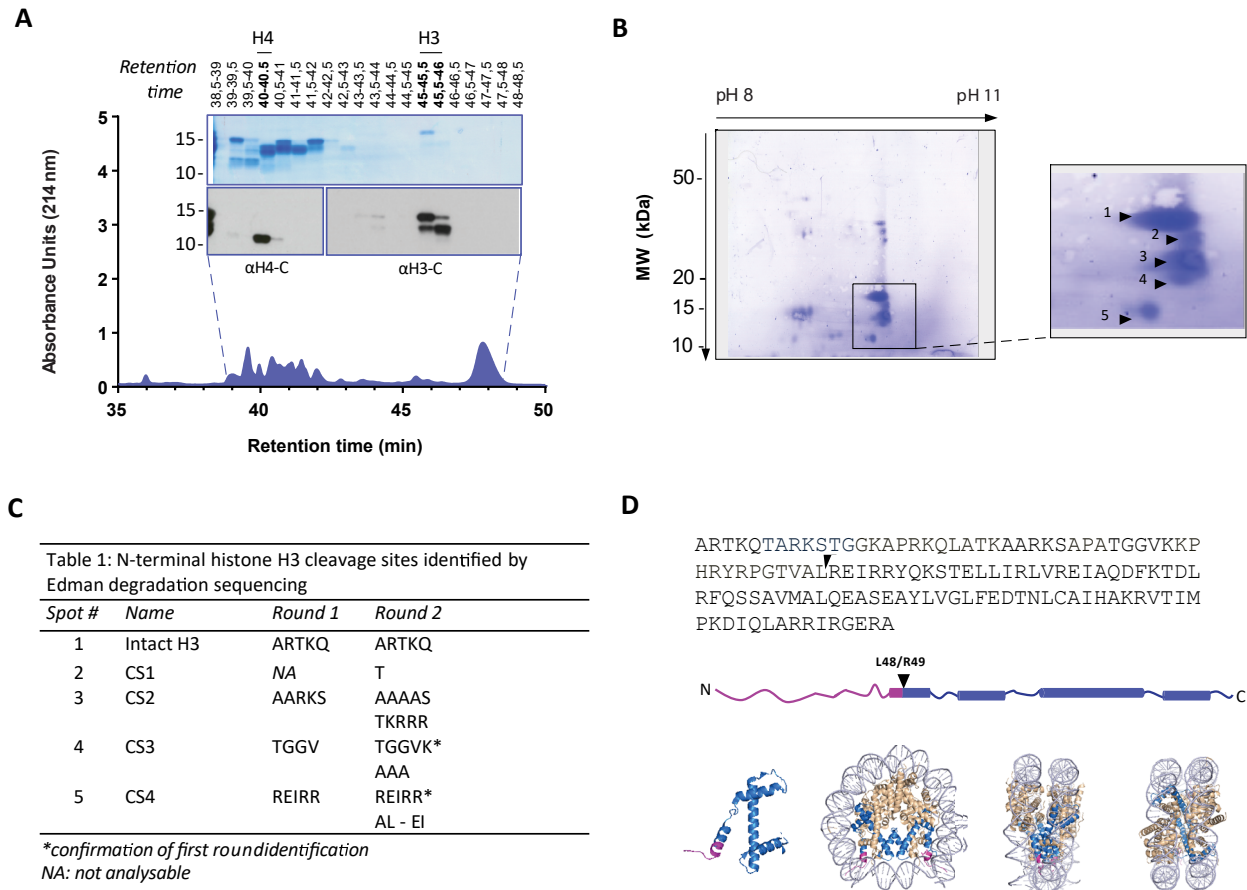

125

126 **Figure 2. Identification of histone H3 cleavage sites in NET formation.**

127 (A) Representative RP-HPLC chromatogram of acid extracted histones from NETs and corresponding 1D-  
 128 SDS-PAGE and immunoblots to identify H3 and H4 containing fractions. Histone enriched supernatants were  
 129 prepared from neutrophils stimulated with PMA for 90 min. Purification and subsequent 2-DE analysis was  
 130 repeated 3 times with independent donors. (B) Representative Coomassie stained blot of pooled H3 fractions  
 131 separated by 2-DE. Inset is a zoom of all spots (1-5) identified as histone H3 by mass spectrometry. Other  
 132 proteins identified are listed in Figure 2-figure supplements 2 and 3 (C) Summary of Edman degradation  
 133 sequencing results of the H3 spots in two independent experiments. In the second experiment overlapping  
 134 sequences were detected. However, the detected amino acids for spot 4 and 5 confirmed the initial sequence  
 135 identification from round 1\*. (D) Schematic representation of the cleavage site of the truncated H3 product in  
 136 both the linear sequence of H3 and in the nucleosomal context. H3 is represented in blue and the pink tail  
 137 region and partial alpha helix represent the part of H3 that is removed. The nucleosome structure is adapted  
 138 from PDB 2F8N (Chakravarthy, 2005).

139

140 **Generation of a histone H3 cleavage site monoclonal antibody**

141 We adopted a similar strategy to Duncan and colleagues (2008) to raise antibodies against the  
 142 cleaved site. We designed a lysine branched immunogen containing the 5 amino acids at the  
 143 carboxylic side of the H3R49 cleavage site (outlined in Figure 3-figure supplement 1 and 2) and

144 used it to immunize mice. After preliminary screening by ELISA against the immunogen and control  
145 peptides, we selected sera, and later hybridoma clones, that detected cleaved H3 in immunoblots  
146 of PMA stimulated cell lysates. We excluded sera and clones that detected full length histone H3  
147 in addition to cleaved H3 (Figure 3A). We selected sera and clones that detected NETs but not  
148 resting chromatin of naive neutrophils by immunofluorescence microscopy. Of the 6 mice  
149 immunised, we obtained one stable clone, 3D9, that functioned in both Western blot and  
150 microscopy – other clones performed only in Western blot (data not shown). 3D9 recognised a  
151 protein of ~10 kDa in neutrophils stimulated with PMA for 120 min and longer but did not detect  
152 any protein in resting or early stimulated cells (Figure 3A). This band corresponded in size with the  
153 smallest H3 fragment detected by the H3 C-terminal antibody. Interestingly, by microscopy, 3D9  
154 exclusively recognised neutrophils undergoing NETosis – with decondensing chromatin (Figure  
155 3B). To validate the specificity of the antibody for the *de novo* N-terminal H3 epitope of NETs, we  
156 performed competition experiments with the immunising peptide and demonstrated that it could  
157 block 3D9 binding to NETs as shown by immunofluorescent microscopy (Figure 3-figure  
158 supplement 3).

159 3D9 binds specifically to cleaved H3. This antibody binds to the immunizing peptide and to isolated  
160 NETs, but not to equal concentrations of chromatin, recombinant H3 or purified calf thymus DNA,  
161 by direct ELISA (Figure 3C). Furthermore, in immunoprecipitation experiments, 3D9, but not an  
162 isotype control, pulled down intact H3 in lysates of naïve and activated neutrophils, but only the  
163 cleaved fragment from activated cells (Figure 3-figure supplement 4). We detected these pull  
164 downs both by Coomassie and silver stained gels. In a similar experiment, we immunoblotted the  
165 immunoprecipitate with the C-terminal antibody as well as 3D9 (Figure 3-figure supplement 4 [ii]),  
166 and showed that only our monoclonal antibody recognizes cleaved H3. Together this data shows  
167 that 3D9 is selective for cleaved H3 under the denaturing conditions of SDS-PAGE but also  
168 recognizes full length H3 under the more native conditions of IP.

A

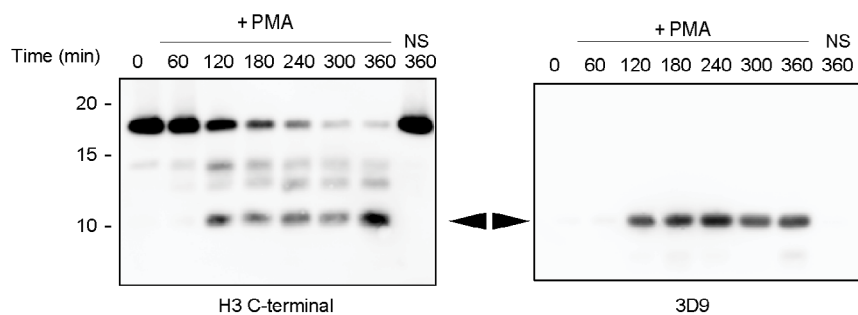

B

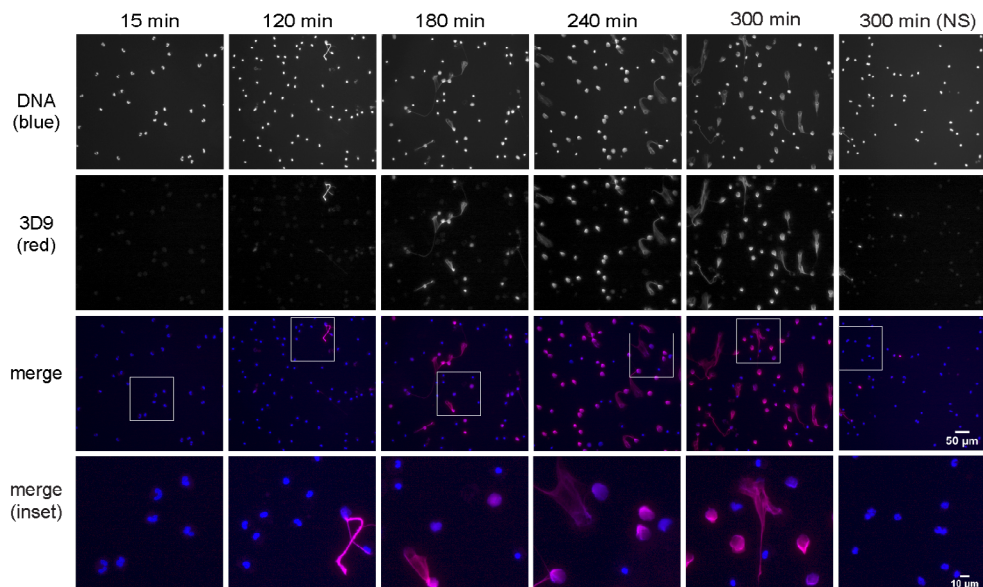

C

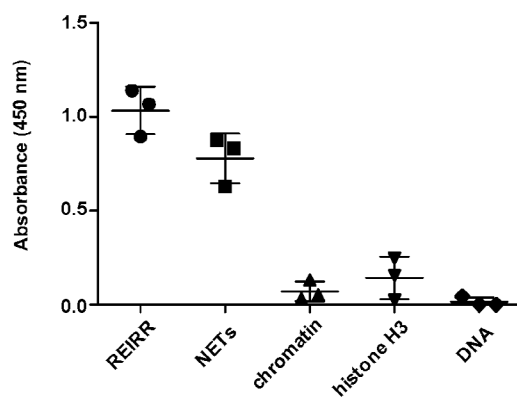

169

170 **Figure 3. Screening and detection of cleaved H3 & NETs by 3D9**

171 (A) Immunoblots of lysates prepared from neutrophils stimulated with PMA (50 nM) for the times indicated in  
172 the figure. H3 C-terminal antibody was used as a control to detect all H3 forms while a single band (cleaved  
173 H3) was detected by the newly generated monoclonal antibody, 3D9. (B) Immunofluorescent microscopy of  
174 neutrophils stimulated with PMA and fixed at the indicated times. Samples were stained with Hoechst (DNA  
175 - blue) and 3D9 (with Alexafluor-568 conjugated secondary antibody - red). NS: non-stimulated. Images were  
176 taken on an upright fluorescent microscope at 20X. Scale bars – 50  $\mu$ m (full field) and 10  $\mu$ m (inset) (C) Direct

177 ELISA for cleaved H3 in NETs, chromatin (A549 lung epithelial cells), recombinant histone H3 and DNA.  
178 Samples were serially diluted and immobilized on a high affinity ELISA plate according to DNA content (for  
179 NETs, chromatin and DNA) or protein content (for recombinant histone H3) as determined by PicoGreen and  
180 bicinchoninic acid assays respectively. Starting concentration was 1 µg/ml DNA or protein. Cleaved H3 was  
181 detected using 3D9 (2 µg/ml) and HRP conjugated anti-mouse secondary antibody and reactions were  
182 developed using TMB (3,3',5,5'-tetramethylbenzidine) as a substrate. Data is presented for dilution  
183 200 ng/ml. REIRR peptide control was coated at 20 ng/ml. Data represents mean ± SD of 3 experiments  
184 using independent NET donors. Source data can be found in Figure 3-Source data 1.

185

### 186 *Epitope mapping*

187 To determine the binding site of 3D9 in histone H3, we tested the antibody by ELISA with  
188 overlapping linear peptide arrays and helical peptide mimic arrays (listed in Supplementary file 1)  
189 based on a sequence (residues 30-70;  
190 PATGGVKKPHRYRPGTVALREIRRYQKSTELLIRKLPFQRL) around the H3R49 cleavage site  
191 (Figure 4-figure supplement 1 and 2). In such assays acetylation is often used to neutralise the  
192 contribution of the amino terminal charge. However, to mimic any potential charge created at the  
193 newly revealed N-terminus, R49, we also included arrays of unmodified peptides. Based on  
194 overlapping peptides, the putative core epitope in the linear array was (R)EIRR. The peptides  
195 ending in REIRR were in all cases in the top 2 of each peptide mimic (Figure 4-figure supplement  
196 3). Interestingly, peptides extended at the N-terminus were still recognized. Moreover, acetylation  
197 at the N-terminus of the peptide ending in the REIRR sequence did not affect the binding,  
198 suggesting that a free N-terminus may not be recognized by the antibody. We further refined the  
199 epitope mapping by amino acid replacement analysis of linear peptides and helical peptide  
200 mimetics ending in REIRR (Figure 4-figure supplement 4)]. Mutations in Glu51, Ile52, and Arg54  
201 negatively impacted the signal, indicating these residues are critical for epitope recognition. A  
202 schematic of the antibody epitope mapped onto H3 is presented in Figure 4.



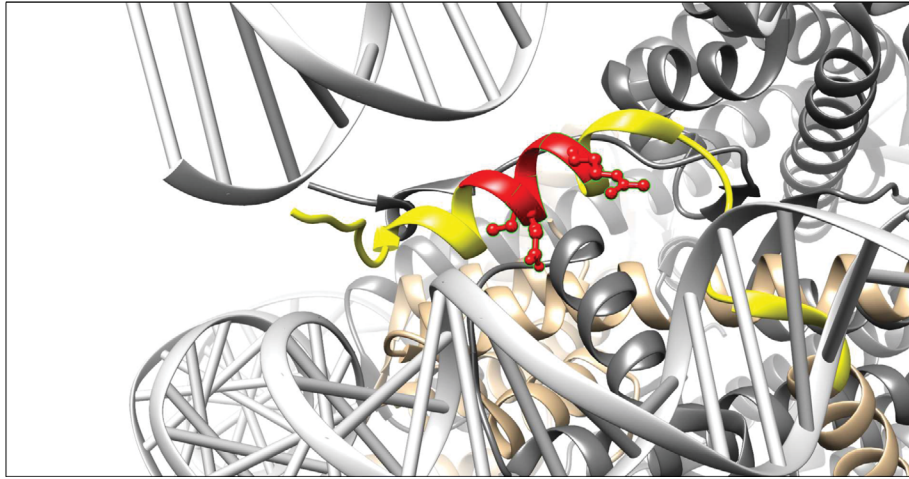

203  
204 **Figure 4. Visualisation of the 3D9 epitope in the nucleosome core complex.**

205 Visualization of the putative core epitope for 3D9 mapped on to histone H3 ribbon structure. The observed  
206 core binding site of 3D9 to the peptide arrays was depicted on histone H3 (light brown) in the nucleosome  
207 complex structure (file 3AZG.pdb). Part of the peptide sequences used in the peptide arrays is coloured in  
208 yellow. The core epitope (R)EIRR is displayed in red, with the atoms of the critical residues (Glu51, Ile52,  
209 and Arg54) shown. Binding profiles of antibody to linear and helical arrays, in addition to amino acid  
210 replacement analysis are presented in Figure 4-figure supplement 1-4.

211

## 212 *Automatic quantification of in vitro generated NETs by microscopy*

213 We tested how 3D9 stained NETs in immunofluorescence in samples that were robustly  
214 permeabilized (Triton X-100, 0.5% for 10 min) to facilitate the distribution of the antibody throughout  
215 the sample. Figure 5A shows that 3D9 detects decondensed chromatin almost exclusively. In  
216 contrast, the anti-chromatin antibody (PL2.3) - directed against a H2A-H2B-DNA epitope (Losman  
217 et al., 1992) – stains NETs in addition to condensed nuclei. We compared the staining  
218 characteristics of 3D9 and PL2.3 during NET formation. We determined the nuclear area and signal  
219 intensity at the indicated time points, from multiple fields of view (Figure 5B). Both antibodies detect  
220 the increase in nuclear area characteristic of NETosis between 15 and 180 min after simulation. At  
221 later time points, the intensity of PL2.3 staining decreased and failed to discriminate between  
222 resting cell nuclei and NETs. In contrast, 3D9 stained nuclei undergoing NETosis with greater  
223 intensity than nuclei of non-activated cells.

224 Publicly available software (ImageJ) can be used to quantify *in vitro* NETosis. We compared 3D9  
225 versus the anti-chromatin antibody with our previously published semi-automatic image analysis

226 (Brinkmann et al., 2012) and with a modified automatic method (Figure 5-figure supplement 1).  
227 Both methods use automatic thresholding of the DNA channel (Hoechst) to count total cells/objects.  
228 The historical semi-automatic method exploits the differential staining by chromatin antibodies of  
229 decondensed chromatin (high signal) over compact chromatin (weak signal) to count cells in  
230 NETosis. This method uses a manual thresholding and segmentation procedure (denoted manual  
231 in the figure). This manual thresholding step is subject to observer bias. In contrast, the modified  
232 method uses automatic thresholding at both stages; total cell and NET counts. Both methods use  
233 a size exclusion particle analysis step so that only structures larger than a resting nucleus are  
234 counted. Both 3D9 and PL2.3 antibodies effectively quantified NETs using previously published  
235 method (Figure 5C - manual). However, PL2.3 failed to accurately quantify the number of NETs  
236 with the fully automatic method, specifically at early time points after stimulation (15 min). In this  
237 case, the weakly staining lobulated nucleus can extend over a larger surface area during cell  
238 activation and adhesion resulting in these cells being wrongly categorised as NETs by the  
239 algorithm. Together, this data suggests that the automatic method using 3D9 staining may reduce  
240 experimental bias.

241



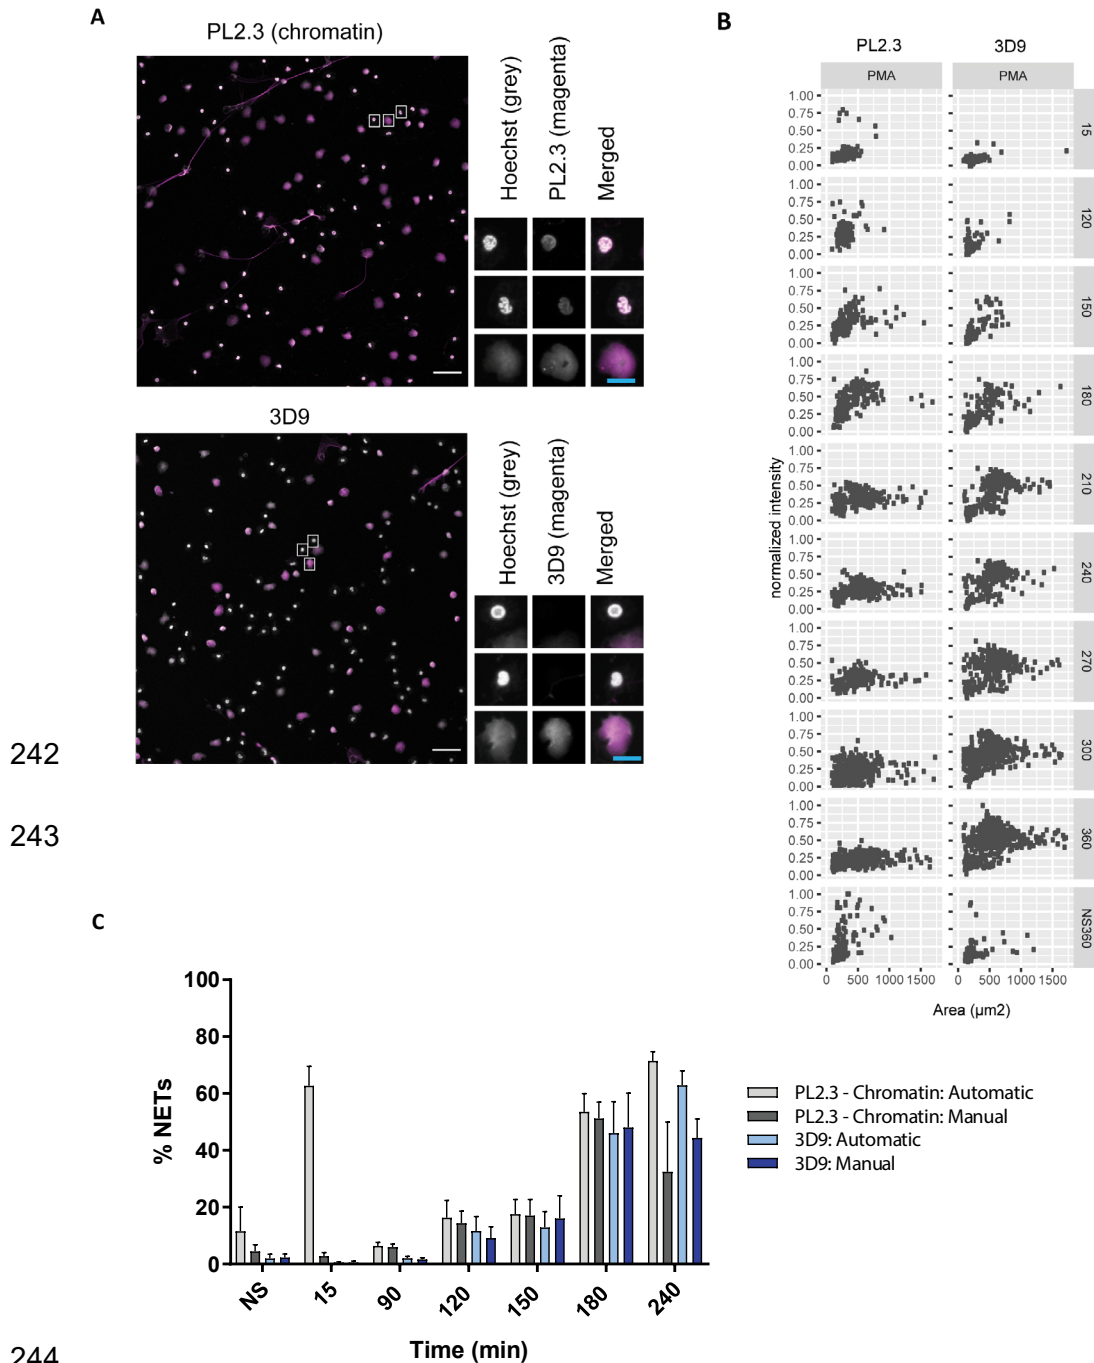

244

245 **Figure 5. Comparison of NET quantification using an anti-chromatin antibody versus 3D9**

246 (A) Confocal immunofluorescent microscopy of neutrophils stimulated with PMA (180 min) and stained with  
 247 Hoechst and anti-chromatin antibody (PL2.3) or 3D9. Insets represent selected cells examined at higher  
 248 magnification (63X) and presented as split channels in grayscale or merged as per the total field of view (20X  
 249 magnification). White scale bar - 50  $\mu\text{m}$ , cyan scale bar - 10  $\mu\text{m}$ . Images are representative of 3 experiments  
 250 (B) Comparison of the fluorescent distribution of PL2.3 versus 3D9 staining of PMA stimulated cells over time  
 251 (6h). Staining intensities were normalized over all images of the respective time course. NS:360: non-  
 252 stimulated at 360 min. Analysis is performed on one data set that is representative of 3-4 independent time  
 253 course experiments. (C) Comparison of NET quantification using manual or automatic thresholding and  
 254 segmentation procedures for chromatin antibody (PL2.3) and cleaved H3 antibody (or 3D9). Manual  
 255 thresholding excludes cells/NETs with a weak signal whereas automatic thresholding includes all objects  
 256 irrespective of signal. Images for analysis were taken using a fluorescence microscope. Graph represents  
 257 the mean  $\pm$  standard deviation, where  $n=3-5$ . Source data can be found in Figure 5-Source Data 1.

258 **3D9 detects NETs induced by multiple stimuli**

259 Histone H3 cleavage is a feature of the neutrophil response to multiple NET stimuli (Kenny et al.,  
260 2017). 3D9 detects NETs induced by the bacterial toxin nigericin, which induces NETs  
261 independently of NADPH oxidase activation (Kenny et al., 2017), by heme in TNF primed  
262 neutrophils (Knackstedt et al., 2019) and by the fungal pathogen *Candida albicans* (Figure 6).  
263 Interestingly, in *C. albicans* infections, we observed both 3D9 positive and negative NETs.

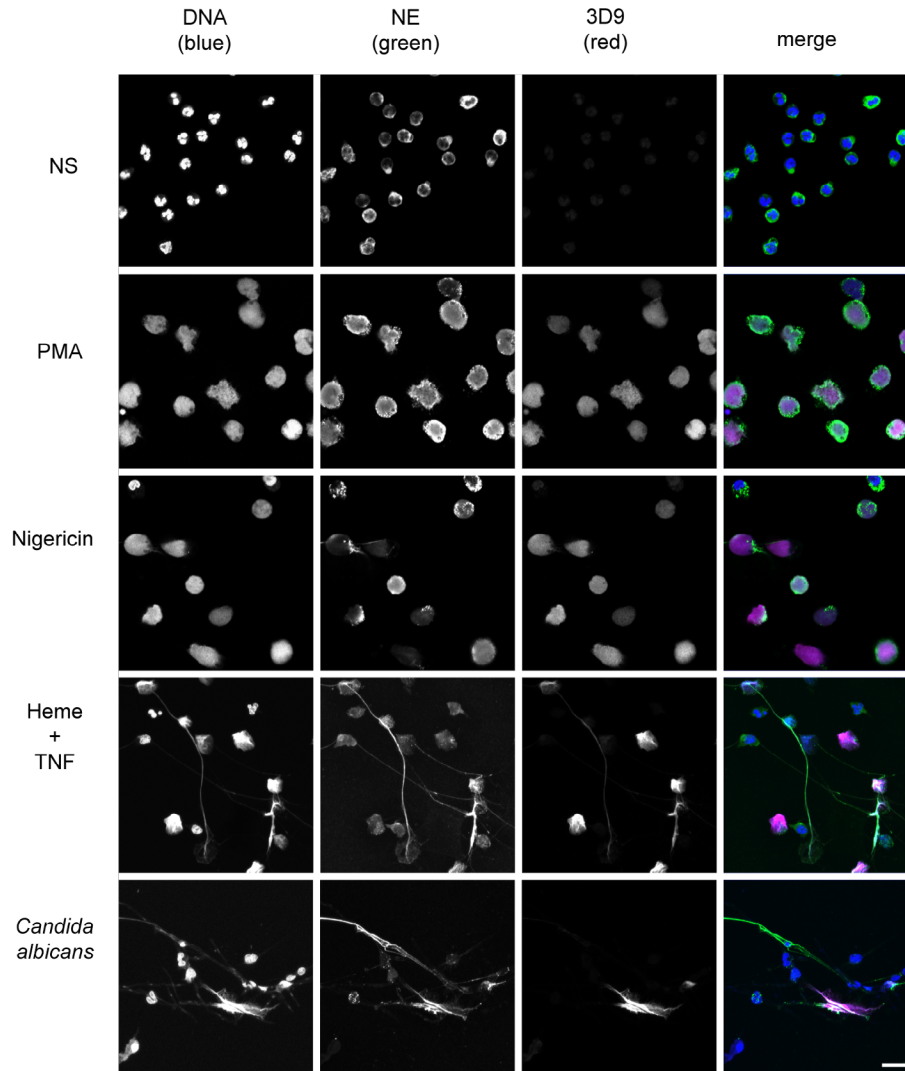

264

265 **Figure 6. Detection by 3D9 of NETs from diverse stimuli.**

266 Immunofluorescence microscopy of neutrophils left unstimulated (NS), stimulated with PMA (50 nM, 2.5h),  
267 nigericin (15  $\mu$ M, 2.5 h), TNF primed and then stimulated with heme (20  $\mu$ M, 6h), and neutrophils co-cultured  
268 with *Candida albicans* hyphae (MOI 5) for 4h. Samples were stained with Hoechst, anti-neutrophil elastase  
269 (NE) and 3D9. Scale bar – 50  $\mu$ m. Images were taken on a confocal microscope at 20X and are  
270 representative of 3 experiments with independent donors. Scale bar - 20  $\mu$ m.

271

## 272 *3D9 distinguishes NETs in mixed cell samples*

273 Histone H3 clipping, albeit at other sites in the N-terminal tail, was observed in mast cells (Melo et  
274 al., 2014) and unstimulated PBMC fractions (Howe and Gamble, 2015). Of note, PBMC fractions  
275 often contain contaminating neutrophils (Hacbarth and Kajdacsy-Balla, 1986). To test if 3D9  
276 specifically stained neutrophils treated with NET stimuli, we incubated PBMCs with PMA or  
277 nigericin (Figure 7). Importantly, 3D9 detected only nuclei that appeared decondensed in cells that  
278 were positive for NE, a specific neutrophil marker. In contrast, the chromatin antibody stained both  
279 neutrophils in NETosis and nuclei of other cells. This shows that 3D9 detects NETs specifically  
280 even in the presence of other blood cells.

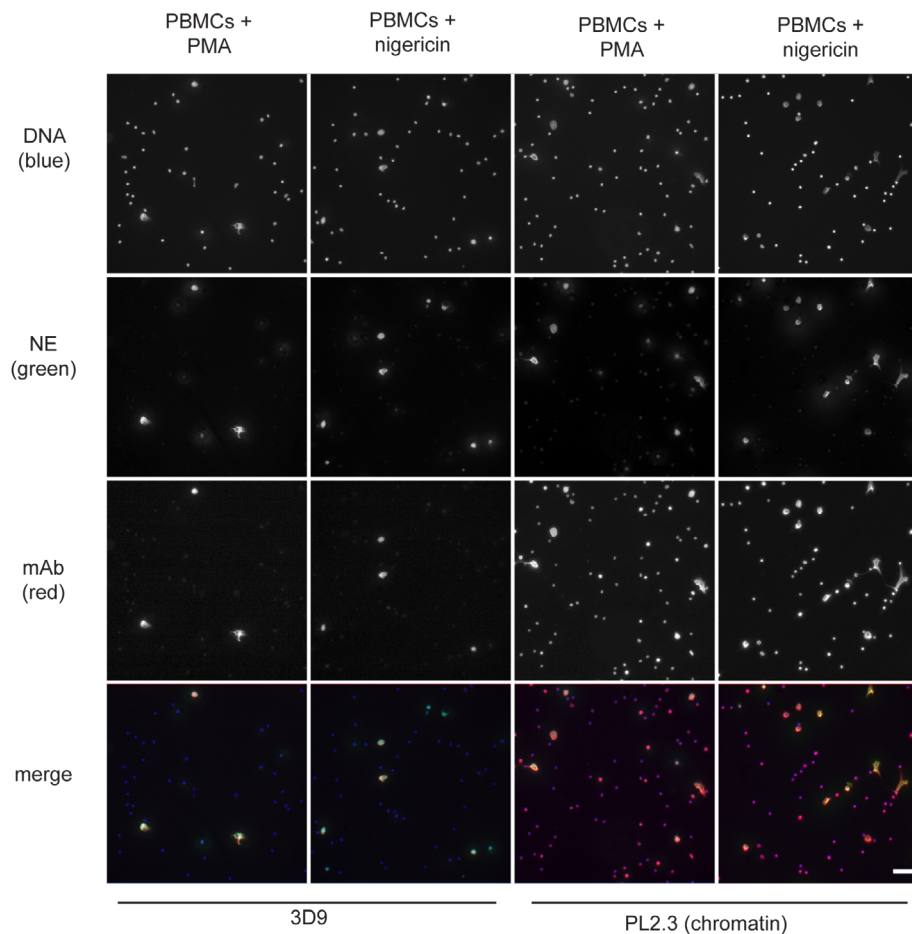

## 282 **Figure 7. Detection of NETs in mixed cell fractions**

283 Immunofluorescence microscopy of non-purified peripheral blood mononuclear cell (PBMC) fractions treated  
284 with the NET stimuli, PMA (50 nM, 2.5h) or nigericin (15  $\mu$ M, 2.5 h), and then stained with Hoechst, anti-  
285 neutrophil elastase (NE) and 3D9 or PL2.3. Images were taken on an upright fluorescent microscope at 20X  
286 magnification. The selected images are representative of 3 independent experiments. Scale bar – 50  $\mu$ m.

287 *3D9 distinguishes NETosis from other forms of cell death in neutrophils*

288 Neutrophils can commit to other cell death pathways (recently reviewed by Dabrowska et al., 2019)  
289 besides NETosis. Naïve neutrophils undergo apoptosis after overnight incubation (Kobayashi et  
290 al., 2005) and necroptosis upon TNF $\alpha$  stimulation in the presence of a SMAC (second  
291 mitochondria-derived activator of caspase) mimetic and if caspases are inhibited (Galluzzi et al.,  
292 2012). Interestingly, the anti-chromatin antibody (Figure 8-figure supplement 1), but not 3D9,  
293 stained the condensed nuclei of cells undergoing apoptosis (Figure 8) and neither of the antibodies  
294 stained cells during necrosis induced by the staphylococcal toxin  $\alpha$ -haemolysin nor after stimulation  
295 with necroptosis inducers.

296

297

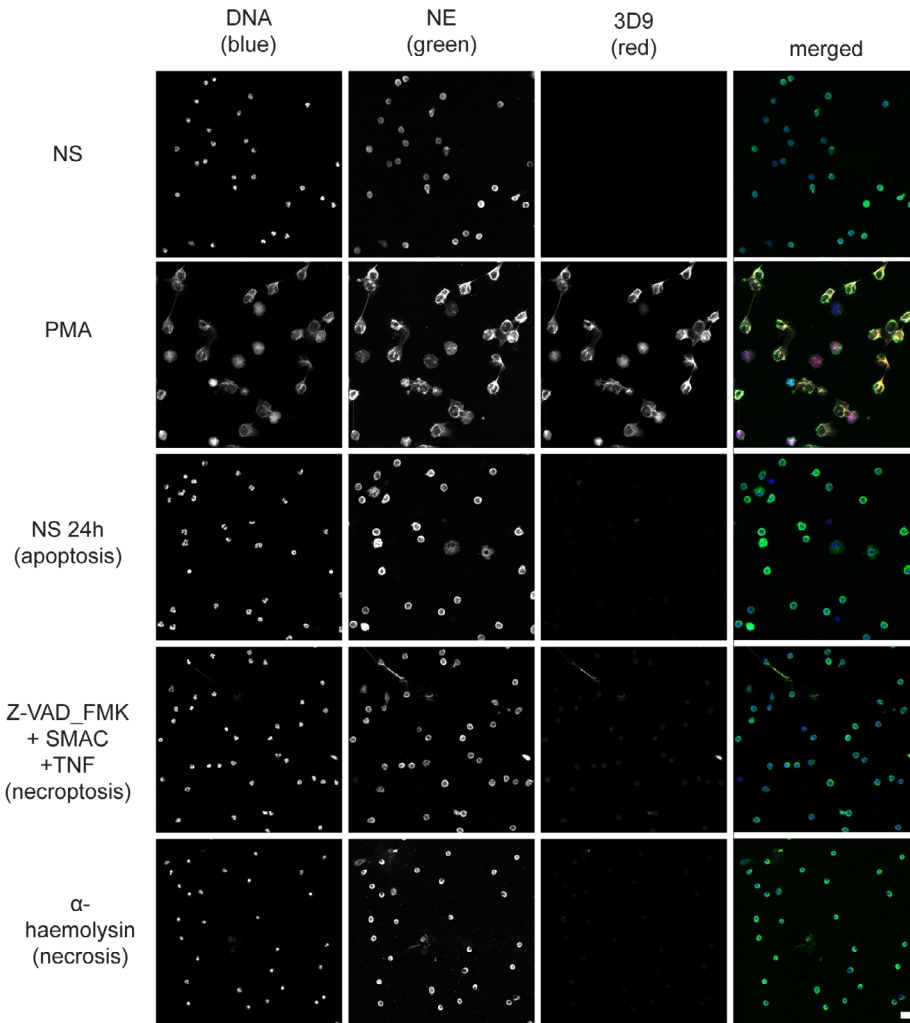

298

299 **Figure 8. Comparison of 3D9 detection in response to apoptotic, necroptotic & necrotic cell death**  
300 **stimuli.**

301 Confocal immunofluorescent microscopy of neutrophils stimulated with different cell death stimuli and  
302 subsequently stained with Hoechst, anti-neutrophil elastase (NE) and 3D9. NETs were induced with PMA  
303 (100 nM, 3h). Apoptosis was induced in resting neutrophils by incubation for 24h without stimulation  
304 overnight. Neutrophils were stimulated with Z-VAD-FMK (50  $\mu$ M) plus SMAC mimetic (100 nM) plus TNF (50  
305 ng/ml) for 6h to induce necroptosis. Necrosis was induced with the pore forming toxin  $\alpha$ -haemolysin (25  
306  $\mu$ g/ml). Images were taken at 20X and are representative of 3 experiments. Scalebar 20  $\mu$ m. A comparison  
307 was made with parallel samples stained with the chromatin antibody PL2.3 and are presented in Figure 8-  
308 figure supplement 1.

309

310 **3D9 labels NETs in human tissue sections**

311 NETs are found in inflamed tissues based on the juxtaposition of chromatin and granular makers  
312 as well as the detection of citrullinated H3. 3D9 stains areas of decondensed DNA (Hoechst) that  
313 colocalise with NE in both inflamed human tonsil (Figure 9A) and human kidney (Figure 9B). This  
314 indicates that 3D9 labels NETs in histological samples - hematoxylin and eosin (HE) tissue



315 overviews are provided in the supplemental figures (Figure 9-figure supplement 1; Figure 10-figure  
316 supplement 1; Figure 11-figure supplement 1). Indeed, in kidney (Figure 9C), inflamed appendix  
317 (Figure 10) and gallbladder (Figure 11), 3D9 labelled DNA in the same cluster as anti-H3cit or anti-  
318 H2B. Interestingly, 3D9 stained decondensed, more NET-like structures, while anti-H3cit or anti-  
319 H2B antibodies stained relatively compact chromatin. Furthermore, colocalization analysis of 3D9  
320 with H2B or with H3cit revealed that 3D9 was more commonly colocalised with H2B as compared  
321 to H3cit; overlap coefficients 0.463 (3D9-H2B) v 0.125 (3D9-H3cit), and 0.533 (3D9-H2B) v 0.122  
322 (3D9-H3cit) for Figure 10. figure supplement 1 and Figure 11-figure supplement 1 respectively.

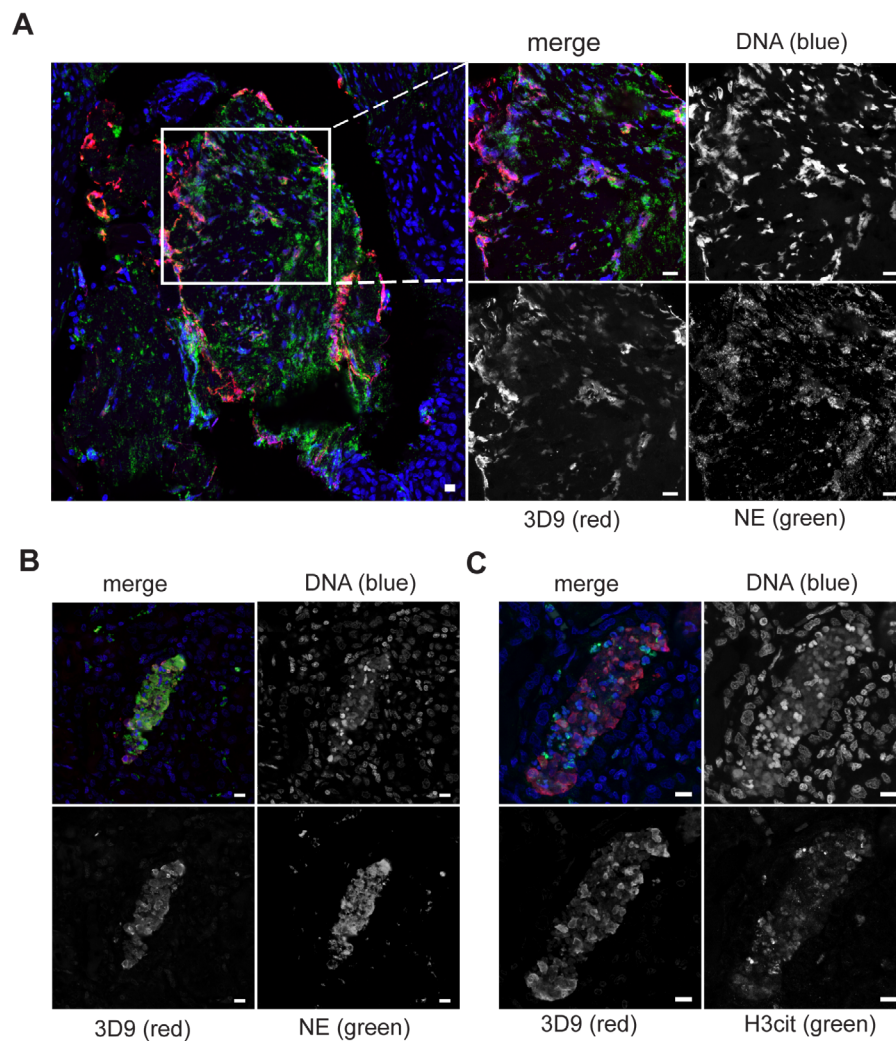

323

324 **Figure 9. Detection of clipped histone 3 & NETs in human tissues**

325 Paraffin embedded sections were stained with Hoechst, anti-NE and 3D9 or H3cit antibodies and examined  
326 by confocal microscopy. Scale bar - 10  $\mu$ m (A) inflamed human tonsil (B & C) Inflamed human kidney.

327

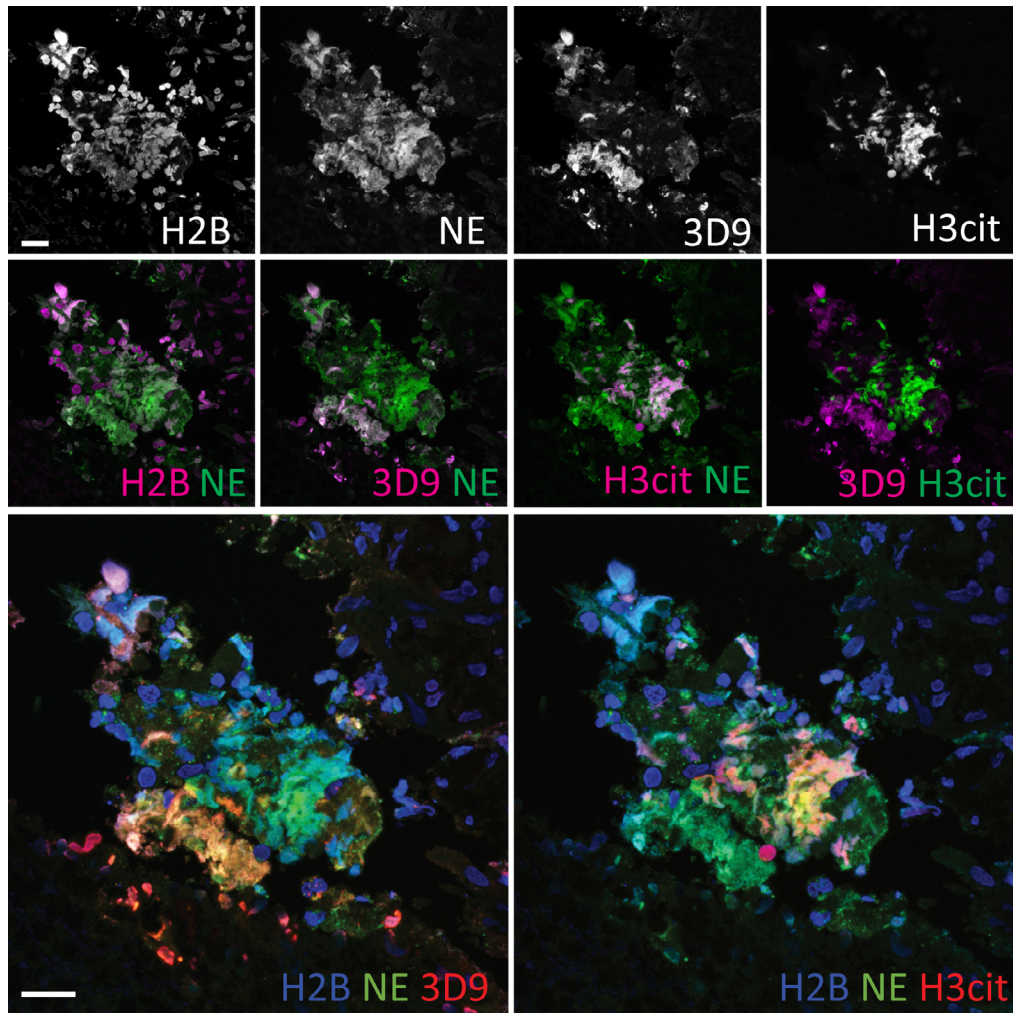

328

329 **Figure 10. Comparison of Clipped H3, H3cit & H2B staining in the gallbladder**

330 Paraffin embedded sections were stained with Hoechst, anti-NE and histone antibodies 3D9, H3cit and H2B

331 and examined by confocal microscopy. Scale bar – 20  $\mu$ m.



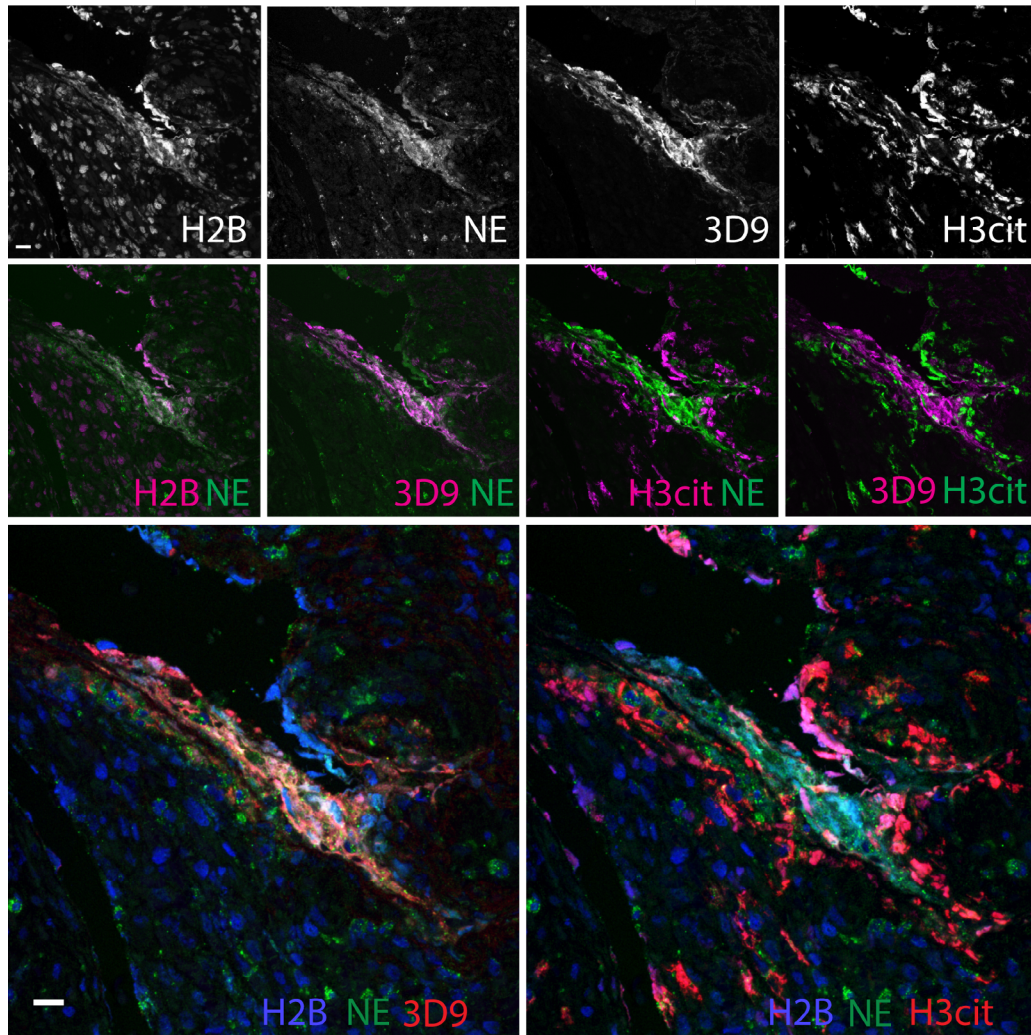

332

333 **Figure 11. Comparison of Clipped H3, H3cit & H2B staining in the appendix**

334 Paraffin embedded sections were stained with Hoechst, anti-NE and 3D9 or H3cit antibodies and examined  
335 by confocal microscopy. Scale bar - 20  $\mu$ m.

336

## 337 Discussion

338 Decondensed chromatin is a defining feature of NETs. It occurs through PTMs that partially  
339 neutralise the histone positive charge and thus the affinity of histones for negatively charged DNA  
340 (Papayannopoulos et al., 2010; Wang et al., 2009). One way to achieve this is through proteolytic  
341 removal of the lysine and arginine rich histone tails. Using a biochemical and proteomic approach,  
342 we determined that H3 is cleaved within its globular domain during NETosis. We exploited the



343 specificity of this event to produce a mouse monoclonal antibody to the *de novo* histone H3 epitope,  
344 the new N-terminal beginning at R49. This antibody, 3D9, recognises human NETs induced by both  
345 microbial and host derived physiological stimuli and distinguishes netotic neutrophils from  
346 neutrophils that die via alternative pathways. It also discriminates between NETs and other cells in  
347 mixed blood cell fractions and, importantly, NETs in human histological samples.

348 Until now, histone citrullination is the only PTM that has been used for antibody-based detection of  
349 NETs. In this paper, we propose histone cleavage at H3R49 as a new histone PTM that can be  
350 used for broad detection of NETs from human samples. The use of H3cit for the detection of NETs  
351 is not without controversy. Not all NETs are citrullinated and NET formation can occur in the  
352 absence or inhibition of citrullinating enzymes (Kenny et al., 2017; Konig and Andrade, 2016). By  
353 identifying the precise histone cleavage site, we shed further light on this. The most commonly  
354 used H3cit antibody detects citrullination of R2, R8 and R17. However, histone cleavage at R49  
355 would remove the H3cit epitopes, rendering these NET defining PTMs mutually exclusive on a  
356 single histone level. Indeed, co-staining by anti-H3cit and 3D9 in inflamed kidney, gallbladder and  
357 appendix paraffin sections revealed extensive mutual exclusion of the two marks and more  
358 abundant staining of decondensed chromatin by 3D9. Thus, we propose that 3D9 will allow broad  
359 detection of NETs but may display a preference for more mature or proteolytically processed NETs.

360

361 In contrast to the present study, histone cleavage was reported as discriminating between different  
362 pathways of NET formation (Pieterse et al., 2018). Using a sandwich ELISA approach, Pieterse *et*  
363 *al* concluded that, generally, the N-terminal histone tails are removed in NOX dependent but not  
364 NOX independent NET formation. They used a suite of N-terminal directed antibodies for H2B, H3  
365 and H4, and all H3 epitopes were located N-terminal to the cleavage site H3R49. However, in the  
366 final biological sample testing the authors did not examine H3. Interestingly, the authors observed  
367 that, by immunofluorescent microscopy, all histone N-terminal antibodies failed to stain NETs at  
368 time points after cell lysis. Therefore, to us, this data suggests that at later stages in NETosis the

369 histone N-terminal tails, at least for H3, are removed irrespective of the pathway of activation. This  
370 is in line with our observations that both NOX dependent (PMA, heme) and NOX independent  
371 (nigericin) stimuli result in NETs that are recognised by 3D9 and supports our finding that histone  
372 H3 cleavage at R49 is a general feature of human NET formation.

373 In this study we detect NETs in fixed or denatured human samples from *in vitro* experiments and  
374 histological samples. While an ELISA with 3D9 revealed a preference for NETs over isolated  
375 chromatin or recombinant H3, immunoprecipitation of naïve cell lysates by 3D9 also pulled down  
376 full length H3 as confirmed by immunoblot. It is not yet clear if this is due to co-immunoprecipitation  
377 due to the presence of low levels of clipped histone or if this represents true recognition of intact  
378 H3 by 3D9. Thus, care should be taken when detecting cleaved H3 or NETs under native and mild  
379 detergent conditions and all sample types e.g. serum samples, need careful validation for cross  
380 reactivity.

381 More broadly, and applying to the general principles of NET detection, it is not yet possible to prove  
382 conclusively that the detected decondensed chromatin originates from the same cell source as the  
383 neutrophil proteins which decorate it. For example, in an infected necrotic wound to which to high  
384 numbers of neutrophils are recruited. Here, activated neutrophils might release both proteases  
385 (Borregaard et al., 1993) and citrullinating enzymes (Spengler et al., 2015; Zhou et al., 2017) that  
386 bind to and modify extracellular chromatin generating a NET - according to the histological  
387 definition. This remains a conundrum that requires further exploration.

388 N-terminal histone cleavage at H3R49 is a novel and so far undescribed cleavage site in any  
389 eukaryotic organism. Unusually, it is located in the globular rather than the unstructured tail region  
390 of H3. H3R49 is one of 6 key residues important for the regulation of H3K36me<sup>3</sup> and forms part of  
391 the structured nucleosome surface (Endo et al., 2012). Thus, we speculate that removal of the N-  
392 terminal tail, in its entirety, could lead to removal of higher order structure interactions and facilitate  
393 chromatin decondensation e.g. removal of H3K9me and its associated heterochromatin protein 1  
394 interactions (Jacobs and Khorasanizadeh, 2002). To determine the contribution of histone cleavage

395 at H3R49 to the process of chromatin decondensation, future work will focus on establishing the  
396 protease(s) responsible and the sequence of proteolytic events leading to this final truncation of  
397 H3 and NET formation. Given the specificity of this event and its restriction to NETotic forms of cell  
398 death, we propose that N-terminal cleavage at H3R49 is an example of histone ‘clipping’ in  
399 neutrophils – a term proposed by the histone/histone proteolysis field for specific histone cleavage  
400 sites for which a biological function has been demonstrated (Dhaenens et al., 2015).

401 In conclusion, this study represents the first identification of a distinctive and exclusive marker of  
402 NETs and describes the development and characterisation of a complementary antibody to  
403 facilitate easier detection of human NETs. Analogous to finding a smoking gun at a crime scene,  
404 the monoclonal antibody 3D9 detects evidence of the proteolytic events that occur in NETosis –  
405 the proteolytic signature, histone cleavage at H3R49. In doing so, 3D9 discriminates NETs from  
406 chromatin of other cells and chromatin of neutrophils that die via alternative mechanisms. This  
407 added layer of specificity will simplify the detection of NETs in tissue samples and facilitate  
408 comparison of quantitative studies between labs. This will be an important step in assessing the  
409 contribution of extracellular chromatin and NETs to disease pathology.

## 410 **Materials and methods**

### 411 ***Reagents***

412 All reagents were purchased from common vendors of laboratory reagents e.g. Sigma Aldrich or  
413 VWR Deutschland unless otherwise stated.

### 414 ***Blood collection and ethical approval***

415 Venous blood was collected from healthy donors who had provided informed consent according to  
416 the Declaration of Helsinki. Ethical approval was provided by the ethics committee of Charité-  
417 Universitätsmedizin Berlin and blood was donated anonymously at Charité Hospital Berlin.

#### 418 ***Purification and culture of human peripheral blood neutrophils***

419 Neutrophils were isolated as described by Amulic et al (2017). Briefly, venous whole blood was  
420 collected in EDTA and separated by layering over equal volume Histopaque 1119 and  
421 centrifugation at 800 g (20 min). The pinkish neutrophil rich fraction was collected and washed once  
422 by the addition of 3 volumes of wash buffer (PBS, without Mg<sup>2+</sup> or Ca<sup>2+</sup> [Gibco] supplemented with  
423 0.5% [w/v] human serum albumin [HSA, Grifols]) and centrifugation at 300 g (10 min). The  
424 neutrophil fraction was further purified by density gradient centrifugation - Percoll (Pharmacia)  
425 gradient from 85%-65% (v/v). Purified cells were collected from the 80-70% fractions and washed  
426 once before being resuspended in wash buffer. Cells were counted using a CASY cell counter.

427 For all experiments, unless indicated, neutrophils were cultured RPMI (GIBCO 32404014)  
428 supplemented with 10 mM HEPES and 0.1% (w/v) HSA, which had been preequilibrated in CO<sub>2</sub>  
429 conditions for 1 h. For some stimuli, the HSA content was reduced to 0.05% or 0% HSA as indicated  
430 in the figure legends. Cells were routinely cultured at 37°C, 5% CO<sub>2</sub> unless indicated. For all  
431 experiments, stimuli were added to cell reactions as 10X working stock solutions freshly diluted in  
432 RPMI. For inhibition experiments, a 10X inhibitor stock and appropriate vehicle controls, were  
433 added to the cells and preincubated for the times stated in the figure legends.

#### 434 ***Neutrophil and NET lysate preparation***

435 To analyse proteins, lysates were prepared from stimulated or resting neutrophils. Cells were  
436 seeded in culture medium in 1.5 ml microcentrifuge tubes at 1x10<sup>7</sup> cells/ml with 5x10<sup>6</sup> cells per time  
437 point. After addition of the inhibitor or agonist, cells were gently mixed and incubated at 37 °C with  
438 gentle rotation. At the specified time points, protease inhibitors - 1 mM AEBSF, 20 µM Cathepsin  
439 G inhibitor I (Calbiochem), 20 µM neutrophil elastase inhibitor GW311616A (Biomol), 2X Halt  
440 protease inhibitor cocktail (PIC, Thermofisher Scientific), 10 mM EDTA, 2 mM EGTA - were added  
441 directly to the cell suspension. Cells were gently mixed and centrifuged at 1000 g (30 s) to collect  
442 all residual liquid. Freshly boiled 5X sample loading buffer (50 mM Tris-HCl pH 6.8, 2% [w/v] SDS,  
443 10% glycerol, 0.1% [w/v] bromophenol blue, 100 mM DTT) was added to samples which were then

444 briefly vortexed and boiled (98 °C) for 10 min with agitation and flash frozen in liquid nitrogen for  
445 storage at -80 °C.

#### 446 **1D SDS-PAGE and immunoblot blot**

447 For routine protein analysis, samples were analysed by 1D SDS-PAGE and immunoblotted.  
448 Samples were thawed on ice, boiled at 98 °C (10 min) and sonicated to reduce viscosity (Braun  
449 sonicator, 10 s, cycle 7, power 70%). Proteins were applied to NuPAGE 12% gels (Invitrogen,  
450 ThermoFisher) and run at 150 V in MES buffer (ThermoFisher Scientific). Proteins were transferred  
451 by western blot onto PVDF (0.2 µm pore size, Amersham GE Healthcare) using the BioRad wet  
452 transfer system (buffer: 25 mM Tris, 192 mM glycine, 20% methanol, protocol: 30 min at 100 mA,  
453 120 min at 400 mA). Blotting efficacy was assessed by Ponceau S staining. Blots were blocked  
454 with TBST (TBS pH 7.5, 0.1% [v/v] Tween-20) with 5% [w/v] skimmed milk, for 1 h at RT. Blots  
455 were then incubated with the following primary antibodies overnight at 4 °C or for 2 h at RT: rabbit  
456 anti-histone H3 C-terminal pAb, 1:15000 (Active motif #61277); rat anti-histone H3 N-terminal mAb,  
457 1:1000 (Active Motif #61647, aa 1-19); Histone H4 C-terminal, 1:5000 (Abcam 10158 – aa 50 to C  
458 terminal); rabbit anti-histone H4 N-terminal mAb, 1:30,000 (Upstate, Millipore #05-858, aa17-28);  
459 rabbit GAPDH mAb, 1:5000 (Cell Signalling Technology, #2118); mouse 3D9 1ug/ml (produced in  
460 this study) – all diluted in TBST with 3% (w/v) skimmed milk. After washing with TBST (3 x 5 min),  
461 blots were blocked for 15 min as before and then probed with secondary HRP conjugated  
462 antibodies (Jackson ImmunoResearch -diluted 1:20000 in 5% skimmed milk TBST) for 1 h at RT.  
463 Blots were washed in TBST (3 x 5 min) and developed using SuperSignal™ West Dura Extended  
464 Duration Substrate (ThermoFisher Scientific) and an ImageQuant Gel imager (GE Healthcare).

#### 465 **Immunofluorescent staining of in vitro samples**

466 For immunofluorescent imaging of purified cells, neutrophils/PBMCs were seeded in 24 well dishes  
467 containing glass coverslips, with  $1 \times 10^5$  cells per well and incubated at 37 °C for 1 h to allow to  
468 adhere to the coverslip. At this stage, inhibitors and priming factors were included as indicated.  
469 Reactions were stopped by the addition of paraformaldehyde (2% [w/v]) for 20 min at RT or 4°C

470 overnight. After fixation, cells were washed and stained as previously described (Brinkmann et al  
471 2012). Briefly, all steps were performed by floating inverted coverslips on drops of buffer on  
472 laboratory parafilm. Cells were permeabilised with PBS, pH 7.5, 0.5% (v/v) Triton X-100 for 3 min.  
473 For screening and quantification experiments, this permeabilization step was extended to 10 min.  
474 Samples were washed (3 x 5 min) with PBS, 0.05% (v/v) Tween 20 and incubated with blocking  
475 buffer - PBS pH 7.5, 0.05% (v/v) Tween 20, 3% (v/v) normal goat serum, 3% (w/v) freshwater fish  
476 gelatin, 1% (w/v) BSA - for 20 min at RT and then probed with primary antibodies diluted in blocking  
477 buffer and incubated overnight at 4 °C. Primary antibodies: anti-chromatin (H2A-H2B-DNA  
478 complex) mouse mAb, 1 µg/ml (Losman 1992); neutrophil elastase, rabbit pAb 1:500 (Calbiochem);  
479 mouse serum for screening, 1:100; hybridoma supernatants, neat; 3D9 mouse mAb, 1 µg/ml.  
480 Samples were then washed as before. Alexa labelled secondary antibodies (Invitrogen) were  
481 diluted 1/500 in blocking buffer and incubated for 2 h at RT. DNA was stained with Hoescht 33342  
482 (Invitrogen, Molecular Probes) 1 µg/ml, incubated with the secondary antibody step. Samples were  
483 washed in PBS followed by water and mounted in Mowiol mounting medium.

#### 484 ***Histone extraction from neutrophils***

485 Histone enriched fractions were prepared from resting neutrophils and NETs according to a method  
486 modified from Shechter et al (2007). Neutrophils ( $4-8 \times 10^7$ ) were resuspended in 13 ml of RPMI  
487 (without HSA) in a 15 ml polypropylene tube and incubated on a roller at 37 °C with PMA 50 nM  
488 for 90 min. After stimulation, 1 mM AEBSF was added to inhibit further degradation by NSPs and  
489 cells were cooled on ice for 10 min. All subsequent steps were performed on ice or 4 °C where  
490 possible. Cells and NETs were pelleted by centrifugation at 1000 g, 10 min. Samples were  
491 resuspended in ice-cold hypotonic lysis buffer (10 mM Tris-HCl pH 8.0, 1 mM KCL, 1.5 mM MgCl<sub>2</sub>,  
492 1 mM DTT supplemented with protease inhibitors just before use – 1 mM AEBSF, 20 µM NEi, 20  
493 µM CGi, 2X PIC, 10 mM EDTA) using 1 ml of buffer/ $5 \times 10^6$  cells. Cells were then incubated at 4 °C  
494 on a rotator for 30 min before being passed through a syringe to aid lysis and shearing of intact  
495 cells. Nuclei and NETs were collected by centrifugation at 10,000 g, 10 min, discarding the  
496 supernatant. To disrupt nuclei, samples were resuspended in dH<sub>2</sub>O (1 ml/ $1 \times 10^7$  cells)

497 supplemented with protease inhibitors, as before, and incubated on ice for 5 min with intermittent  
498 vortexing. NP40 (0.2% [v/v]) was added to help lysis and disruption of NETs and samples were  
499 sonicated briefly (10 s, mode 7, power 70%). To extract histones, H<sub>2</sub>SO<sub>4</sub> (0.4 N) was added to  
500 samples, and vortexed briefly. Samples were then incubated, rotating, for 2-3h. Histone enriched  
501 fractions were collected by aliquoting samples into multiple 1.5 ml microcentrifuge tubes and  
502 centrifuging at 16,000 g for 10 min, followed by collection of the supernatants. To minimise further  
503 processing of histones, proteins were immediately precipitated overnight by dropwise addition of  
504 trichloroacetic acid to a final concentration of 33% followed by mixing. The next day precipitated  
505 proteins were pelleted by centrifugation at 16,000 g, 10 min. The supernatants were discarded and  
506 waxy pellets were washed once with equal volume ice-cold acetone with 0.2% (v/v) HCl and 5  
507 times with ice-cold acetone alone. Pellets were allowed to air dry for 5 min before being  
508 resuspended with 1 ml (per 5x10<sup>6</sup> cells) of dH<sub>2</sub>O plus 1 mM AEBSF. For difficult to resuspend  
509 pellets the mixture was vigorously shaken at 4°C overnight before samples were centrifuged, as  
510 before, to remove undissolved protein. Pooled supernatants for each sample were lyophilised and  
511 stored at -80°C until histone fractionation.

### 512 ***Purification of histone H3***

513 Histones were fractionated by RP-HPLC according to the method described by Shechter et al  
514 (2007). After lyophilisation samples were resuspended in 300 µl Buffer A (5% acetonitrile, 0.1%  
515 trifluoroacetic acid) and centrifuged at 14,000 g to remove particulate matter. 150 µl of clarified  
516 sample was mixed with 40 µl Buffer A before being applied to a C18 column (#218TP53, Grave  
517 Vydac) and subjected to RP-HPLC (Waters 626 LC System, MA, US) as described by Schechter et  
518 al (2007). The flow rate was set to 1 ml min<sup>-1</sup> and fractions were collected at 30 s intervals from  
519 minute 30 to 55. All fractions were lyophilised and stored at -80 °C until analysis. To determine  
520 which fractions contained H3 and cleaved species, each fraction was dissolved in 50 µl dH<sub>2</sub>O and  
521 5 µl was subjected to SDS-PAGE and either stained with Coomassie blue stain or transferred to  
522 PVDF and immunoblotted for H3 and H4 as described already.



## 523 ***Two dimensional electrophoresis (2-DE) of purified histones***

524 To determine the cleavage sites, H3 containing fractions were pooled and subjected to a small gel  
525 2-DE procedure (Jungblut and Seifert, 1990). Briefly, pooled fractions were denatured in 9 M urea,  
526 70 mM DTT, 2% Servalyte 2-4 and 2 % Chaps. Samples (30 µl) were applied to 1.5 mm thick  
527 isoelectric focusing (IEF) gels using ampholytes 7-9 and a shortened IEF protocol was used: 20  
528 min 100 V, 20 min 200 V, 20 min 400 V, 15 min 600 V, 5 min 800 V, and 3 min 1000 V, (a total of  
529 83 min and 500 Vh) in 8 cm long IEF tube gels. Separation in the second dimension was performed  
530 in 6.5 cm x 8.5 cm x 1.5 mm SDS-PAGE gels. Duplicate gels were prepared; one stained with  
531 Coomassie Brilliant Blue R250 for excision of spots for mass spectrometry identification; and the  
532 second transferred to PVDF as follows. Proteins were blotted onto PVDF blotting membranes (0.2  
533 µm) with a semidry blotting procedure (Jungblut et al., 1990) in a blotting buffer of 100 mM borate.  
534 Spots were stained by Coomassie Brilliant Blue R250 and analysed by N-terminal Edman  
535 degradation sequencing (Proteome Factory, Berlin, Germany).

## 536 ***Antibody generation***

537 Immunising and screening peptides are outlined in S.Table 2 (Figure 3-figure supplement 2) and  
538 were synthesized by Eurogentec (Belgium). A portion was further conjugated to Key Lymphocyte  
539 Haemoglutinin (KLH) for immunization. Immunisation of mice, preliminary ELISA screening and  
540 production of hybridomas were performed by Genscript as follows. Six mice (3x Balb/c and 3x  
541 C57/BL6) were immunized with branched peptides. Mice were bled and effective immunization was  
542 assessed using a direct ELISA. The ELISA and subsequent inhouse immunoblot and  
543 immunofluorescent microscopy screening strategy are outline in Figure 3-figure supplement 1.  
544 Following selection of effectively immunized animals, a further boost injection of the immunogen  
545 was given before isolation of spleen cells for hybridoma production. The resulting hybridoma  
546 supernatants were screened similarly. Large-scale culture of supernatants and purification of  
547 antibodies was performed by Genscript.



548 **ELISA**

549 To assess 3D9 specificity for NETs, 3D9 was used in an indirect ELISA to detect cleaved H3 in  
550 purified NETs, chromatin, recombinant H3 and DNA. NETs were prepared by seeding  $3 \times 10^6$   
551 neutrophils in a 6 well dish and incubating for 3-6 h with 100 nM PMA. NETs were gently washed  
552 3 times with equal volume PBS, before being collected in 300  $\mu$ l PBS. Clumped NETs were  
553 disrupted by sonicating briefly (3 s, mode 7, power 70% - Braun Sonicator) and then snap frozen  
554 and stored at  $-80^\circ\text{C}$ . Chromatin was prepared from lung epithelial cells (A549) as previously  
555 described by Shechter *et al* (2007). The final nuclear pellet was resuspended in  $\text{dH}_2\text{O}$  and  
556 sonicated as before and stored at  $-80^\circ\text{C}$ . The DNA content of NETs and chromatin was assessed  
557 by PicoGreen assay according to the manufacturer's instructions (ThermoFisher Scientific).  
558 Beginning at 1  $\mu\text{g}/\text{ml}$  (of DNA content), serial dilutions of NETs, chromatin and calf thymus DNA  
559 (Invitrogen) were prepared in lo-DNA bind Eppendorf microcentrifuge tubes. A similar dilution series  
560 of recombinant histone H3 (New England Biolabs) was prepared starting at 1  $\mu\text{g}/\text{ml}$  protein. All  
561 dilutions were performed in PBS. One hundred microliters of each sample, in duplicate, at dilutions  
562 1  $\mu\text{g}/\text{ml}$  to 1  $\text{ng}/\text{ml}$ , was aliquoted in a Nunc Maxisorb 96 well dish and immobilised overnight at  
563  $4^\circ\text{C}$ , 250 rpm. The immunising peptide, REIRR (10 $\text{ng}/\text{ml}$ ) was used as a positive control. The  
564 following day all wells were washed 6 times with wash buffer (PBS, 0.05% Tween 20) and then  
565 blocked with 200  $\mu$ l of blocking solution (1% BSA in wash buffer) for 2 h (RT). Wells were washed  
566 once with wash buffer and incubated with 100  $\mu$ l of 3D9 (2  $\mu\text{g}/\text{ml}$ , in blocking solution) at RT (2 h)  
567 with gentle shaking (250 rpm). Wells were washed 6 times as before and then incubated with 100  
568  $\mu$ l of secondary HRP conjugated anti-mouse (Jackson laboratories) at 1:10,000 dilution in blocking  
569 solution and incubated as before. Finally, wells were washed 6 times as before and HRP activity  
570 was detected using TMB (3,3', 5,5' tetramethylbenzidine) reagent (BD OptEIA™) according to the  
571 manufacturer's instructions (incubating for 15 -30 min). The assay was stopped by the addition of  
572 100  $\mu$ l  $\text{H}_2\text{SO}_4$  (0.16 M) and absorbance (450 nm) was measured on a 96 well plate reader  
573 (VERSAmax, Molecular Devices, CA, US).

#### 574 ***Quantification of staining characteristics by Image J and R***

575 In order to assess staining characteristics of antibodies during NET formation we developed a  
576 bundle of Image J and R scripts. These scripts allow for an automated workflow starting from 2-  
577 channel microscopic images of an experimental series (DNA stain, antibody stain), to a graphical  
578 representation and classification of individual cells and eventually to mapping these classifications  
579 back to the original images as a graphical overlay. In the first step nuclei are segmented based on  
580 intensity thresholding (either programmatic or manual), including options for lower and upper size  
581 selection limits. The same threshold is applied to the entire experimental series and the upper size  
582 limit is used to exclude fused structures that cannot be assigned individual cells. A quality score is  
583 assigned to every image based on the fraction of the total DNA stained area that can be assigned  
584 to individual cells (or NETs). This score along with all other parameters of the analysis is exported  
585 as report file and can be used to automatically exclude images from the analysis. In addition, this  
586 part of the script generates a result file that includes the area, circumference (as x,y coordinates)  
587 and cumulative intensities for each channel for every detected nucleus along with information such  
588 as time point or stimulus that can be assigned programmatically. In order to analyse these data  
589 sets we implemented a series of functions in R. These functions include import of Image J result  
590 files, classification of cells based on nuclear area and staining intensity, various plot and data export  
591 functions, as well mapping functions that allow to display the classification of nuclei as color coded  
592 circumferences overlaid on the original images. The scripts are available for download at  
593 <https://github.com/tulduro/NETalyser>

#### 594 ***Quantification of NETs by Image J***

595 NETs were quantified by the semi-automatic method described by Brinkmann et al (2012) and via  
596 a second modified method that allowed automatic quantification. All microscopy image datasets  
597 were processed by both methods to allow comparison. Hoechst was used to stain total DNA and  
598 NETs were additionally stained with anti-chromatin (PL2.3) or 3D9 antibodies (1 µg/ml) and Alexa-  
599 568 coupled secondary antibody according to the previous section. Images were acquired with a  
600 Leica DMR upright fluorescence microscope equipped with a Jenoptic B/W digital microscope

601 camera and 10x or 20x objective lens. For each experiment, the same exposure settings were used  
602 for all samples and a minimum of 3 random fields of view (FOV) were collected. Images were  
603 analysed using ImageJ/FIJI software. As described by Brinkmann et al (2012), each channel was  
604 imported as an image sequence and converted into a stack. To count total cells/NETs per FOV,  
605 the Hoechst channel stack was imported and segmented using the automatic thresholding function  
606 (Bernsen method) with radius 15 and parameter 1 set to 35 to produce a black and white  
607 thresholded image. Particle analysis was then performed to count all objects the size of a cell  
608 nucleus or bigger (10x objective: particle size 25-infinity; 20x objective: particle size 100-infinity)  
609 and to exclude background staining artefacts. Total NETs were then counted using the anti-  
610 chromatin (PL2.3) or 3D9 channels accordingly. For the method published in 2012, anti-chromatin  
611 stains were segmented using manually adjusted thresholding so that the less intense staining of  
612 resting cell nuclei was excluded. Particle analysis was then performed to count all objects larger  
613 than a resting cell nucleus (10x objective: particle size 75-infinity; 20x objective: particle size 250-  
614 infinity). This was also performed for 3D9. In contrast, in the second analysis, the workflow was  
615 modified so that the automatic Bernsen thresholding and segmentation were used for both Hoechst  
616 and NET channels, total cells and NETs respectively. For each method percentage NETs were  
617 calculated as (NETs/Total cells) x100. Results per FOV were then averaged according to sample.  
618 A schematic of the different workflows is presented in Figure 5-supplement 1.

### 619 ***Immunofluorescent staining of histological samples from tissue sections***

620 Paraffin sections (2 µm thick) were deparaffinized in two changes of 100% xylene for 5 min each  
621 and then rehydrated in two changes of 100% ethanol for 5 min each and followed by 90% and 70%  
622 ethanol for 5 min each. Sections were washed with 3 changes of deionized water and incubation  
623 in TBS (Tris buffered saline). For antigen retrieval, Target Retrieval Solution (TRS pH9) (Dako  
624 S2367) was used to incubate the slides in a steam cooker (Braun) for 20 min. After cooling down  
625 to room temperature in antigen retrieval buffer, slides were rinsed 3x in deionized water and  
626 incubated in TBS until further processing. Slides were blocked with blocking buffer (1% BSA, 5%  
627 normal donkey serum, 5% cold water fish gelatin and 0.05% Tween20 in TBS, pH7.4) for 30 min.

628 Blocking buffer was removed, and sections were incubated with primary antibodies at appropriate  
629 dilution in blocking buffer (containing 0.05% Triton-X100) overnight at RT. Sections were rinsed in  
630 TBS and then incubated with secondary antibody at an appropriate concentration (1:100) for 45  
631 min in the dark at RT and then rinsed three times in TBS for 5 min followed by rinsing with deionized  
632 water. Slides were incubated with DNA stain Hoechst 33342 (1:5000) for 5 min, rinsed with water  
633 before mounting with Mowiol. Primary antibodies for detection of NETs were as follows: mouse  
634 anti-cleaved histone 3 clone 3D9 (2 µg/ml); rabbit anti-histone H3 antibody (citrulline R2 + R8 +  
635 R17; ab5103, Abcam); chicken anti-Histone H2B ab134211 Abcam (1:400); sheep anti-ELANE  
636 (NE) LS-Bio LSB 4244 Lot 75251. Secondary antibodies were the following: donkey anti-rabbit  
637 immunoglobulin G (IgG) heavy and light chain (H&L) Alexa Fluor 488 (Jackson 711-225-152); and  
638 donkey anti-mouse IgG H&L Cy3 (Jackson 715-165-151); donkey anti-sheep (IgG) H&L Alexa Fluor  
639 647 (Jackson 713-605-147). An upright widefield microscope (Leica DMR) equipped with a  
640 JENOPTIK B/W digital microscope camera or a Leica confocal microscope SP8 were used for  
641 fluorescent imaging. Z-stack images were collected at 63× magnification. Where stated  
642 colocalisation analysis was performed on confocal images using Volocity 6.5.1 software. Human  
643 tonsil and kidney paraffin tissue blocks were purchased from AMSbio. Inflamed tissue from a  
644 gallbladder and an appendix was obtained from archived leftover paraffin embedded diagnostic  
645 samples and used in an anonymised way after approval through the Charité Ethics Committee  
646 (Project EA4/124/19, July 24, 2019). Informed consent from patients for use of biomaterials for  
647 research was obtained as part of the institutional treatment contract at Charité.

#### 648 **Statistics**

649 All experiments were repeated 3 times unless stated differently in the figure legend. Experimental  
650 repeats are biological replicates, where each replicate represents cells isolated from a different  
651 donor. All graphs were prepared in GraphPad Prism and are either representative traces or mean  
652 ± standard deviation as stated in the figure legend. Graphs for epitope mapping were produced by  
653 Pepscan using proprietary software.

## 654 *Contributions*

655 DOT- Conceptualization, methodology, investigation, data curation, figure preparation, writing  
656 original draft, review and editing; UZA - 2-DE, blotting and sample preparation for protein  
657 sequencing; UA -preparation of human pathology tissue samples and microscopy of tissue  
658 samples, image curation; MS - MALDI mass spectrometry; SF - provision and description of human  
659 pathology tissues and advice on histology figure presentation; PRJ - proteomic and 2-DE analysis;  
660 VB - colocalisation analysis, image curation, reviewing and critical feedback on manuscript; AH -  
661 conceptualization, data curation for R analysis, R scripting; AZ- conceptualization, reviewing and  
662 editing of manuscript; AZ and AH provided critical feedback to DOT and helped shape the research,  
663 analysis and manuscript.

## 664 *Acknowledgements*

665 The authors would like to give special thanks to Borko Amulic and Gerben Marsman for their  
666 constructive feedback at the early stages of manuscript preparation. This work was supported by  
667 the Max Planck Society.

## 668 *Competing interests*

669 DOT, AH and AZ and the Max Planck Society have submitted a patent application concerning the  
670 antibody developed in this study.

## 671 *List of supplemental figures (located after references)*

672 **Figure 1-figure supplement 1.** Cysteine protease inhibition by E64 does not inhibit histone H3  
673 cleavage.

674 **Figure 1-figure supplement 2.** AEBSF does not inhibit ROS production

675 **Figure 1-figure supplement 3.** AEBSF is not cytotoxic.

676 **Figure 2-figure supplement 1.** Schematic summary of extraction & identification of histone H3  
677 cleavage sites in NETs.

678 **Figure 2-figure supplement 2.** Separation of histone H3 by two dimensional electrophoresis

679 **Figure 2-figure supplement 3.** S.Table 1 : Mass spectrometry identification of proteins co-  
680 separating with histone H3 following 2-DE.

681 **Figure 3-figure supplement 1.** Outline of immunisation & screening strategy for antibody  
682 production.  
683 **Figure 3-figure supplement 2.** S.Table 2: List of immunisation, screening and competition peptides.  
684 **Figure 3-figure supplement 3.** Peptide inhibition of 3D9 binding to NETs  
685 **Figure 3-figure supplement 4.** 3D9 immunoprecipitation  
686 **Figure 4-figure supplement 1.** Binding profiles recorded for 3D9 on the linear peptide array.  
687 **Figure 4-figure supplement 2.** Binding profiles recorded for 3D9 on helical peptide mimics  
688 arrays.  
689 **Figure 4-figure supplement 3.** S.Table 3. Summary of identified 3D9 binding regions in the  
690 peptide array.  
691 **Figure 4-figure supplement 4.** Fine epitope mapping by replacement analysis.  
692 **Figure 5-figure supplement 1.** Workflow of NET analysis methods  
693 **Figure 8-figure supplement 1.** Comparison of PL2.3 detection in response to apoptotic,  
694 necroptotic & necrotic cell death stimuli.  
695 **Figure 9-figure supplement 1.** Hematoxylin & eosin (HE) stain of kidney section  
696 **Figure 10-figure supplement 1.** Hematoxylin & eosin (HE) stain of gallbladder & colocalization  
697 analysis  
698 **Figure 11-figure supplement 1.** Hematoxylin & eosin stain of inflamed appendix & colocalization  
699 analysis.  
700

701 *List of supplemental files*

702 **Supplementary file 1.** Peptides for epitope mapping  
703 **Supplementary file 2.** Supplemental Methods  
704 **Figure 1-Figure supplement 2-Source Data 1.** AEBSF does not inhibit the ROS burst  
705 **Figure 1-Figure Supplement 3\_Source Data 1.** AEBSF is not cytotoxic  
706 **Figure 3-Source Data 1.** Direct ELISA for cleaved H3  
707 **Figure 4-Figure supplement 1-Source Data 1.** Linear and helical peptide epitope mapping  
708 **Figure 4-Figure supplement 2-Source Data 1.** Linear and helical peptide epitope mapping  
709 **Figure 4-Figure supplement 4-Source Data 1-Fine epitope mapping by replacement analysis**  
710 **Figure 5-Source Data 1.** Comparison of NET quantification using manual or automatic  
711 thresholding and segmentation procedures for chromatin antibody and 3D9  
712



## 713 *References*

- 714 Albregues, J., Shields, M.A., Ng, D., Park, C.G., Ambrico, A., Poindexter, M.E., Upadhyay, P.,  
715 Uyeminami, D.L., Pommier, A., Kuttner, V., *et al.* (2018). Neutrophil extracellular traps produced  
716 during inflammation awaken dormant cancer cells in mice. *Science* **361**. 10.1126/science.aao4227
- 717 Amulic, B., Knackstedt, S.L., Abu Abed, U., Deigendesch, N., Harbort, C.J., Caffrey, B.E.,  
718 Brinkmann, V., Heppner, F.L., Hinds, P.W., and Zychlinsky, A. (2017). Cell-Cycle Proteins Control  
719 Production of Neutrophil Extracellular Traps. *Dev Cell* **43**, 449-462 e445.  
720 10.1016/j.devcel.2017.10.013
- 721 Bannister, A.J., and Kouzarides, T. (2011). Regulation of chromatin by histone modifications. *Cell*  
722 *Res* **21**, 381-395. 10.1038/cr.2011.22
- 723 Bianchi, M., Hakkim, A., Brinkmann, V., Siler, U., Seger, R.A., Zychlinsky, A., and Reichenbach, J.  
724 (2009). Restoration of NET formation by gene therapy in CGD controls aspergillosis. *Blood* **114**,  
725 2619-2622. 10.1182/blood-2009-05-221606.
- 726 Borregaard, N., Lollike, K., Kjeldsen, L., Sengelov, H., Bastholm, L., Nielsen, M.H., and Bainton,  
727 D.F. (1993). Human neutrophil granules and secretory vesicles. *Eur J Haematol* **51**, 187-198.  
728 10.1111/j.1600-0609.1993.tb00629.x.
- 729 Brinkmann, V., Goosmann, C., Kuhn, L.I., and Zychlinsky, A. (2012). Automatic quantification of in  
730 vitro NET formation. *Frontiers in immunology* **3**, 413. 10.3389/fimmu.2012.00413.
- 731 Brinkmann, V., Reichard, U., Goosmann, C., Fauler, B., Uhlemann, Y., Weiss, D.S., Weinrauch,  
732 Y., and Zychlinsky, A. (2004). Neutrophil extracellular traps kill bacteria. *Science* **303**, 1532-1535.  
733 10.1126/science.1092385
- 734 Chakravarthy, S., Luger, K. (2005). Nucleosomes containing the histone domain of macroH2A: In  
735 vitro possibilities. 10.2210/pdb2f8n/pdb
- 736 Cools-Lartigue, J., Spicer, J., McDonald, B., Gowing, S., Chow, S., Giannias, B., Bourdeau, F.,  
737 Kubes, P., and Ferri, L. (2013). Neutrophil extracellular traps sequester circulating tumor cells and  
738 promote metastasis. *The Journal of clinical investigation*. 10.1172/JCI67484
- 739 Dabrowska, D., Jablonska, E., Iwaniuk, A., and Garley, M. (2019). Many Ways-One Destination:  
740 Different Types of Neutrophils Death. *Int Rev Immunol* **38**, 18-32.  
741 10.1080/08830185.2018.1540616
- 742 Demers, M., Wong, S.L., Martinod, K., Gallant, M., Cabral, J.E., Wang, Y., and Wagner, D.D.  
743 (2016). Priming of neutrophils toward NETosis promotes tumor growth. *Oncoimmunology* **5**,  
744 e1134073. 10.1080/2162402X.2015.1134073
- 745 Dhaenens, M., Glibert, P., Meert, P., Vossaert, L., and Deforce, D. (2015). Histone proteolysis: a  
746 proposal for categorization into 'clipping' and 'degradation'. *Bioessays* **37**, 70-79.  
747 10.1002/bies.201400118
- 748 Diatchuk, V., Lotan, O., Koshkin, V., Wikstroem, P., and Pick, E. (1997). Inhibition of NADPH  
749 oxidase activation by 4-(2-aminoethyl)-benzenesulfonyl fluoride and related compounds. *The*  
750 *Journal of biological chemistry* **272**, 13292-13301. 10.1074/jbc.272.20.13292.
- 751 Duncan, E.M., Muratore-Schroeder, T.L., Cook, R.G., Garcia, B.A., Shabanowitz, J., Hunt, D.F.,  
752 and Allis, C.D. (2008). Cathepsin L proteolytically processes histone H3 during mouse embryonic  
753 stem cell differentiation. *Cell* **135**, 284-294. 10.1016/j.cell.2008.09.055
- 754 Endo, H., Nakabayashi, Y., Kawashima, S., Enomoto, T., Seki, M., and Horikoshi, M. (2012).  
755 Nucleosome surface containing nucleosomal DNA entry/exit site regulates H3-K36me3 via

- 756 association with RNA polymerase II and Set2. *Genes Cells* 17, 65-81. 10.1111/j.1365-  
757 2443.2011.01573.x
- 758 Galluzzi, L., Vitale, I., Abrams, J.M., Alnemri, E.S., Baehrecke, E.H., Blagosklonny, M.V., Dawson,  
759 T.M., Dawson, V.L., El-Deiry, W.S., Fulda, S., *et al.* (2012). Molecular definitions of cell death  
760 subroutines: recommendations of the Nomenclature Committee on Cell Death 2012. *Cell Death*  
761 *Differ* 19, 107-120. 10.1038/cdd.2011.96
- 762 Gavillet, M., Martinod, K., Renella, R., Harris, C., Shapiro, N.I., Wagner, D.D., and Williams, D.A.  
763 (2015). Flow cytometric assay for direct quantification of neutrophil extracellular traps in blood  
764 samples. *Am J Hematol* 90, 1155-1158. 10.1002/ajh.24185
- 765 Hacbarth, E., and Kajdacsy-Balla, A. (1986). Low density neutrophils in patients with systemic lupus  
766 erythematosus, rheumatoid arthritis, and acute rheumatic fever. *Arthritis and rheumatism* 29, 1334-  
767 1342. 10.1002/art.1780291105.
- 768 Hakkim, A., Fuchs, T.A., Martinez, N.E., Hess, S., Prinz, H., Zychlinsky, A., and Waldmann, H.  
769 (2011). Activation of the Raf-MEK-ERK pathway is required for neutrophil extracellular trap  
770 formation. *Nat Chem Biol* 7, 75-77. 10.1038/nchembio.496.
- 771 Howe, C.G., and Gamble, M.V. (2015). Enzymatic cleavage of histone H3: a new consideration  
772 when measuring histone modifications in human samples. *Clin Epigenetics* 7, 7. 10.1186/s13148-  
773 014-0041-5
- 774 Jacobs, S.A., and Khorasanizadeh, S. (2002). Structure of HP1 chromodomain bound to a lysine  
775 9-methylated histone H3 tail. *Science* 295, 2080-2083. 10.1126/science.1069473
- 776 Jimenez-Alcazar, M., Kim, N., and Fuchs, T.A. (2017). Circulating Extracellular DNA: Cause or  
777 Consequence of Thrombosis? *Seminars in thrombosis and hemostasis*. 10.1055/s-0036-1597284
- 778 Jungblut, P., Eckerskorn, C., Lottspeich, F., and Klose, J. (1990). Blotting efficiency investigated  
779 by using two-dimensional electrophoresis, hydrophobic membranes and proteins from different  
780 sources. *Electrophoresis* 11, 581-588. 10.1002/elps.1150110709
- 781 Jungblut, P.R., and Seifert, R. (1990). Analysis by high-resolution two-dimensional electrophoresis  
782 of differentiation-dependent alterations in cytosolic protein pattern of HL-60 leukemic cells. *J*  
783 *Biochem Biophys Methods* 21, 47-58. 10.1016/0165-022x(90)90044-d.
- 784 Kenny, E.F., Herzig, A., Kruger, R., Muth, A., Mondal, S., Thompson, P.R., Brinkmann, V., Bernuth,  
785 H.V., and Zychlinsky, A. (2017). Diverse stimuli engage different neutrophil extracellular trap  
786 pathways. *Elife* 6. 10.7554/eLife.24437.
- 787 Knackstedt, S.L., Georgiadou, A., Apel, F., Abu-Abed, U., Moxon, C.A., Cunnington, A.J., Raupach,  
788 B., Cunningham, D., Langhorne, J., Kruger, R., *et al.* (2019). Neutrophil extracellular traps drive  
789 inflammatory pathogenesis in malaria. *Science immunology* 4. 10.1126/sciimmunol.aaw0336
- 790 Kobayashi, S.D., Voyich, J.M., Whitney, A.R., and DeLeo, F.R. (2005). Spontaneous neutrophil  
791 apoptosis and regulation of cell survival by granulocyte macrophage-colony stimulating factor.  
792 *Journal of leukocyte biology* 78, 1408-1418. 10.1189/jlb.0605289
- 793 Konig, M.F., and Andrade, F. (2016). A Critical Reappraisal of Neutrophil Extracellular Traps and  
794 NETosis Mimics Based on Differential Requirements for Protein Citrullination. *Frontiers in*  
795 *immunology* 7, 461. 10.3389/fimmu.2016.00461
- 796 Losman, M.J., Fasy, T.M., Novick, K.E., and Monestier, M. (1992). Monoclonal autoantibodies to  
797 subnucleosomes from a MRL/Mp(-)/+ mouse. Oligoclonality of the antibody response and  
798 recognition of a determinant composed of histones H2A, H2B, and DNA. *Journal of immunology*  
799 (Baltimore, Md : 1950) 148, 1561-1569. (DOI not assigned)

- 800 Melo, F.R., Vita, F., Berent-Maoz, B., Levi-Schaffer, F., Zabucchi, G., and Pejler, G. (2014).  
801 Proteolytic histone modification by mast cell tryptase, a serglycin proteoglycan-dependent  
802 secretory granule protease. *The Journal of biological chemistry* 289, 7682-7690.  
803 10.1074/jbc.M113.546895
- 804 Neeli, I., and Radic, M. (2013). Opposition between PKC isoforms regulates histone deimination  
805 and neutrophil extracellular chromatin release. *Frontiers in immunology* 4, 38.  
806 10.3389/fimmu.2013.00038
- 807 Papayannopoulos, V. (2018). Neutrophil extracellular traps in immunity and disease. *Nat Rev*  
808 *Immunol* 18, 134-147. 10.1038/nri.2017.105
- 809 Papayannopoulos, V., Metzler, K.D., Hakkim, A., and Zychlinsky, A. (2010). Neutrophil elastase  
810 and myeloperoxidase regulate the formation of neutrophil extracellular traps. *J Cell Biol* 191, 677-  
811 691. 10.1083/jcb.201006052
- 812 Pertiwi, K.R., de Boer, O.J., Mackaaij, C., Pabittei, D.R., de Winter, R.J., Li, X., and van der Wal,  
813 A.C. (2018). Extracellular traps derived from macrophages, mast cells, eosinophils and neutrophils  
814 are generated in a time-dependent manner during atherothrombosis. *The Journal of pathology*.  
815 10.1002/path.5212
- 816 Pieterse, E., Rother, N., Yanginlar, C., Gerretsen, J., Boeltz, S., Munoz, L.E., Herrmann, M.,  
817 Pickkers, P., Hilbrands, L.B., and van der Vlag, J. (2018). Cleaved N-terminal histone tails  
818 distinguish between NADPH oxidase (NOX)-dependent and NOX-independent pathways of  
819 neutrophil extracellular trap formation. *Annals of the rheumatic diseases* 77, 1790-1798.  
820 10.1136/annrheumdis-2018-213223
- 821 Posthumus, W.P., Lenstra, J.A., Schaaper, W.M., van Nieuwstadt, A.P., Enjuanes, L., and Meloen,  
822 R.H. (1990). Analysis and simulation of a neutralizing epitope of transmissible gastroenteritis virus.  
823 *J Virol* 64, 3304-3309. 10.1128/JVI.64.7.3304-3309.1990.
- 824 Saitoh, T., Komano, J., Saitoh, Y., Misawa, T., Takahama, M., Kozaki, T., Uehata, T., Iwasaki, H.,  
825 Omori, H., Yamaoka, S., *et al.* (2012). Neutrophil extracellular traps mediate a host defense  
826 response to human immunodeficiency virus-1. *Cell Host Microbe* 12, 109-116.  
827 10.1016/j.chom.2012.05.015
- 828 Schauer, C., Janko, C., Munoz, L.E., Zhao, Y., Kienhofer, D., Frey, B., Lell, M., Manger, B., Rech,  
829 J., Naschberger, E., *et al.* (2014). Aggregated neutrophil extracellular traps limit inflammation by  
830 degrading cytokines and chemokines. *Nature medicine* 20, 511-517. 10.1038/nm.3547
- 831 Schonrich, G., Kruger, D.H., and Raftery, M.J. (2015). Hantavirus-induced disruption of the  
832 endothelial barrier: neutrophils are on the payroll. *Frontiers in microbiology* 6, 222.  
833 10.3389/fmicb.2015.00222
- 834 Shechter, D., Dormann, H.L., Allis, C.D., and Hake, S.B. (2007). Extraction, purification and  
835 analysis of histones. *Nat Protoc* 2, 1445-1457. 10.1038/nprot.2007.202
- 836 Sollberger, G., Tilley, D.O., and Zychlinsky, A. (2018). Neutrophil Extracellular Traps: The Biology  
837 of Chromatin Externalization. *Dev Cell* 44, 542-553. 10.1016/j.devcel.2018.01.019
- 838 Spengler, J., Lugonja, B., Ytterberg, A.J., Zubarev, R.A., Creese, A.J., Pearson, M.J., Grant, M.M.,  
839 Milward, M., Lundberg, K., Buckley, C.D., *et al.* (2015). Release of Active Peptidyl Arginine  
840 Deiminases by Neutrophils Can Explain Production of Extracellular Citrullinated Autoantigens in  
841 Rheumatoid Arthritis Synovial Fluid. *Arthritis & rheumatology (Hoboken, NJ)* 67, 3135-3145. doi:  
842 10.1002/art.39313
- 843 Urban, C.F., Ermert, D., Schmid, M., Abu-Abed, U., Goosmann, C., Nacken, W., Brinkmann, V.,  
844 Jungblut, P.R., and Zychlinsky, A. (2009). Neutrophil extracellular traps contain calprotectin, a

845 cytosolic protein complex involved in host defense against *Candida albicans*. *PLoS Pathog* 5,  
846 e1000639. 10.1371/journal.ppat.1000639

847 Urban, C.F., Reichard, U., Brinkmann, V., and Zychlinsky, A. (2006). Neutrophil extracellular traps  
848 capture and kill *Candida albicans* yeast and hyphal forms. *Cell Microbiol* 8, 668-676.

849 Wang, Y., Li, M., Stadler, S., Correll, S., Li, P., Wang, D., Hayama, R., Leonelli, L., Han, H.,  
850 Grigoryev, S.A., *et al.* (2009). Histone hypercitrullination mediates chromatin decondensation and  
851 neutrophil extracellular trap formation. *J Cell Biol* 184, 205-213. 10.1083/jcb.200806072

852 Yoo, D.G., Winn, M., Pang, L., Moskowitz, S.M., Malech, H.L., Leto, T.L., and Rada, B. (2014).  
853 Release of cystic fibrosis airway inflammatory markers from *Pseudomonas aeruginosa*-stimulated  
854 human neutrophils involves NADPH oxidase-dependent extracellular DNA trap formation. *Journal*  
855 *of immunology* (Baltimore, Md : 1950) 192, 4728-4738. 10.4049/jimmunol.1301589

856 Yoshida, M., Sasaki, M., Sugisaki, K., Yamaguchi, Y., and Yamada, M. (2013). Neutrophil  
857 extracellular trap components in fibrinoid necrosis of the kidney with myeloperoxidase-ANCA-  
858 associated vasculitis. *Clin Kidney J* 6, 308-312. 10.1093/ckj/sft048

859 Zenaro, E., Pietronigro, E., Della Bianca, V., Piacentino, G., Marongiu, L., Budui, S., Turano, E.,  
860 Rossi, B., Angiari, S., Dusi, S., *et al.* (2015). Neutrophils promote Alzheimer's disease-like  
861 pathology and cognitive decline via LFA-1 integrin. *Nature medicine* 21, 880-886. 10.1038/nm.3913

862 Zhou, Y., Chen, B., Mittereder, N., Chaerkady, R., Strain, M., An, L.L., Rahman, S., Ma, W., Low,  
863 C.P., Chan, D., *et al.* (2017). Spontaneous Secretion of the Citrullination Enzyme PAD2 and Cell  
864 Surface Exposure of PAD4 by Neutrophils. *Frontiers in immunology* 8, 1200.  
865 10.3389/fimmu.2017.01200

866

867

868

869

870

871

872

873

874

875

876

877

878

879

880

881

882

883
